# Supplementary material
Source: PubMed Central journal article supplement (PMC5710243)

## Supplementary Online Content

Hong K-S, Kwon SU, Lee SH, et al; Phase 2 Exploratory Clinical Study to Assess the Effects of Xarelto (Rivaroxaban) Versus Warfarin on Ischemia, Bleeding, and Hospital Stay in Acute Cerebral Infarction Patients With Non-valvular Atrial Fibrillation (Triple AXEL) Study Group. Rivaroxaban vs warfarin sodium in the ultra-early period after atrial fibrillation–related mild ischemic stroke: a randomized clinical trial. *JAMA Neurol*. Published online September 11, 2017. doi:10.1001/jamaneurol.2017.2161

**eTable 1.** Inclusion and Exclusion Criteria

**eTable 2.** Study Procedures

**eTable 3.** Characteristics of Patients Included in Modified Intent-To-Treat Population (ITT) and Those Excluded From the ITT Population

**eTable 4.** Sensitivity Analyses

**eTable 5.** Endpoints in the Per-Protocol Population

**eTable 6.** Characteristics of New Ischemic Lesion in the Modified ITT Population

**eTable 7.** Characteristics of New Intracranial Hemorrhage in the Modified ITT Population

**eTable 8.** Subgroup Analysis for Primary Endpoint in the Modified ITT Population

**eTable 9.** Subgroup Analysis for Recurrent Ischemic Lesion at Week 4 in the Modified ITT Population

**eTable 10.** Subgroup Analysis for Intracranial Hemorrhage at Week 4 in the Modified ITT Population

**eFigure 1.** Onset to Randomization

**eFigure 2.** INR Values in the Warfarin Group

This supplementary material has been provided by the authors to give readers additional information about their work.

**eTable 1.** Inclusion and Exclusion Criteria

Inclusion criteria

1. Acute presumed cardioembolic stroke of mild to moderate severity or TIA that fulfills the following criteria

- 1) Ischemic stroke or TIA with acute ischemic lesion confirmed by DWI
  - 2) Randomization within 5 days after symptom onset
  - 3) Mild to moderate stroke severity defined by acute ischemic lesion on DWI less than 1/3 of MCA territory, 1/2 of ACA territory, 1/2 of PCA territory, and 1/2 of one cerebellar hemisphere
2. Persistent or paroxysmal AF documented by one of followings
- 1) AF documented by 12-lead ECG or Holter within 30 days before randomization
  - 2) Prior history of AF confirmed by the review of medical record
3. Age  $\geq$ 19 years
4. Written informed consent

Exclusion criteria

1. Significant hemorrhagic transformation (parenchymal hematoma type I or type II by the ECASS definition)
2. Mechanical heart valve requiring warfarin therapy
3. Stroke or TIA caused by presumed small vessel occlusion defined as  $<2.0$  cm in largest dimension on DWI and in the distribution of the small, penetrating cerebral arteries
4. Renal impairment (CrCl  $<30$  ml/min) or severe hepatic impairment
5. Active internal bleeding
6. History of symptomatic intracranial bleeding
7. History of major surgery or trauma within 30 days
8. History of clinically significant gastrointestinal bleeding within 6 months
9. Patients treated with intravenous tissue plasminogen activator or intra-arterial fibrinolysis within 48 hours and having significant hemorrhagic transformation or large acute ischemic lesion on DWI ( $>1/3$  of MCA territory, 1/2 of ACA territory, 1/2 of PCA territory, or 1/2 of one cerebellar hemisphere)
10. Severe anemia: Hb level  $<10$  g/dL

11. Bleeding diathesis: platelet count <90,000/ $\mu$ l or PTINR >1.7
12. Uncontrolled hypertension: systolic blood pressure >180 mmHg or diastolic blood pressure >100 mmHg
13. Malignancy or other serious medical conditions with a life expectancy <6 months
14. Planned major surgery or invasive intervention
15. Treatment with a strong inhibitor of cytochrome P450 3A4, such as azole class of antifungal agents (ketoconazole, itraconazole, voriconazole, posaconazole) or protease inhibitors (ritonavir), within 4 days before randomization, or planned treatment during the study period
16. Treatment with a strong inducer of cytochrome P450 3A4 or P-gp, such as rifampicin /rifampin, phenytoin, phenobarbital, carbamazepine, Saint. John's Wort, within 4 days before randomization, or planned treatment during the study period
17. Anticipated long-term treatment with a non-steroidal anti-inflammatory drug
18. Alcohol or drug addiction
19. Contraindication to MRI
20. Pregnancy or breast-feeding
21. Allergy or contraindication to rivaroxaban, warfarin, heparin, or aspirin
22. Inability or unwillingness to comply with study-related procedures
23. Employees of the investigator or study center, with direct involvement in the current study
24. Women unwilling to continue contraception during the study period
25. Participation in other clinical trials within 3 months

**eTable 2.** Study Procedures

| Criteria                         | Screening<br>(from Day -5) | Baseline<br>(Day 1) | Day 5 ± 2 | Week2<br>(Day 14 ± 5) | Week 4<br>(Day 30 ± 5) | Week5<br>(Week4 visit+7±1) | Post study visit <sup>1</sup> | Unscheduled visit <sup>2</sup> |  |
|----------------------------------|----------------------------|---------------------|-----------|-----------------------|------------------------|----------------------------|-------------------------------|--------------------------------|--|
| Informed consent                 | •                          |                     |           |                       |                        |                            |                               |                                |  |
| Demography                       | •                          |                     |           |                       |                        |                            |                               |                                |  |
| Inclusion/Exclusion              | •                          | •                   |           |                       |                        |                            |                               |                                |  |
| Past Medical History             | •                          |                     |           |                       |                        |                            |                               |                                |  |
| Vital sign                       | •                          |                     |           |                       | •                      |                            |                               | •                              |  |
| Laboratory test <sup>3</sup>     | •                          |                     | •         | • <sup>4</sup>        | •                      | • <sup>5</sup>             |                               | •                              |  |
| Pregnancy test <sup>6</sup>      | •                          |                     |           |                       |                        |                            |                               |                                |  |
| ECG                              | •                          |                     |           |                       |                        |                            |                               |                                |  |
| Brain imaging <sup>7</sup>       | •                          |                     |           |                       | •                      |                            |                               | •                              |  |
| mRS                              | •                          |                     |           |                       | •                      |                            |                               | •                              |  |
| NIHSS                            | •                          |                     |           |                       | •                      |                            |                               | •                              |  |
| HAS-BLED, CHADS2-VASC            |                            | •                   |           |                       |                        |                            |                               |                                |  |
| Randomization <sup>8</sup>       |                            | •                   |           |                       |                        |                            |                               |                                |  |
| Drug administration <sup>9</sup> |                            | —————→              |           |                       |                        |                            |                               |                                |  |
| Drug compliance                  |                            | •                   | •         | • <sup>4</sup>        | •                      |                            |                               |                                |  |
| Adverse event monitoring         |                            | —————→              |           |                       |                        |                            |                               |                                |  |
| Concomitant drug                 | •                          | —————→              |           |                       |                        | •                          |                               | •                              |  |

1. Allow tele-monitoring (Day 44 ± 5)
2. Appropriate action performed at the discrete of physician
3. At screening, week 4: CBC, AST, ALT, BUN, Cr, PT, APTT, Na, K, Total cholesterol, hs-CRP, At screening: available laboratory test results performed at emergency room in advance to obtaining informed consent could be utilized, Day 5; PT, BUN, Cr (all subject in warfarin arm and subject with screening CrCl < 45ml/min in Rivaroxaban arm), Week 2; warfarin arm only: PT, BUN, Cr, Week 5; Rivaroxaban arm only: PT, BUN, Cr
4. Refers to Warfarin arm only
5. Refers to Rivaroxaban arm only (Week 5 visit will be performed on 7±1 days post Week 4 visit)
6. For women of childbearing age, HCG urine test
7. Screening; Patients who have baseline DWI, FLAIR, and GRE or SWI are eligible for this trial. At 4 weeks, follow-up MRI scan (including FLAIR and GRE or SWI) is required for all included patients. , and the primary outcome will be assessed using the follow-up MRI scan. For patients who have clinical stroke or intracranial bleeding before the end of trial, MRI will be evaluated at the time of the clinical events. CT scan for outcome assessment will be allowed only for patients who are not able to perform MRI, but have a clinical stroke or symptomatic intracranial bleeding (when the patient's stroke or intracranial bleeding is too serious to perform MRI scan).
8. After completion of all study procedures scheduled at screening visit, randomization is possible on the screening day (Date of

first drug administration will be regarded as Day 1)

9. For Rivaroxaban arm; first 5 days of warfarin transition, Rivaroxaban will be coadministered with warfarin

**eTable 3.** Characteristics of Patients Included in Modified Intent-To-Treat Population (ITT) and Those Excluded From the ITT Population

|                                                        | Modified ITT population (N=183) | Patients who were randomized, but did not receive treatment (N=7) | Patients who were randomized and received treatment, but did not undergo follow-up MRI (N=5) |
|--------------------------------------------------------|---------------------------------|-------------------------------------------------------------------|----------------------------------------------------------------------------------------------|
| Age (years), mean (SD)                                 | 70.4 (10.4)                     | 64.6 (7.7)                                                        | 69.2 (6.1)                                                                                   |
| Female, n (%)                                          | 76 (41.5)                       | 3 (42.9)                                                          | 4 (80.0%)                                                                                    |
| Onset to randomization (day), median (IQR)             | 2.0 (2.0–3.0)                   | 1.0 (1.0-2.0)                                                     | 4.0 (3.0-5.0)                                                                                |
| NIHSS at randomization, median (IQR)                   | 2.0 (0.0–4.0)                   | 3.0 (0.0-3.0)                                                     | 2.0 (1.0-3.0)                                                                                |
| Initial DWI volume (cm <sup>3</sup> ), median (IQR)*   | 3.5 (0.5-12.3)                  | 0.0 (0.0-0.1)                                                     | 0.0 (0.0-33.9)                                                                               |
| Prestroke CHA <sub>2</sub> DS <sub>2</sub> -VASc score |                                 |                                                                   |                                                                                              |
| 0                                                      | 21 (11.5)                       | 1 (16.7)                                                          | 0 (0.0)                                                                                      |
| 1                                                      | 31 (16.9)                       | 1 (16.7)                                                          | 1 (20.0)                                                                                     |
| 2                                                      | 40 (21.9)                       | 2 (33.3)                                                          | 0 (0.0)                                                                                      |
| 3                                                      | 37 (20.2)                       | 1 (16.7)                                                          | 3 (60.0)                                                                                     |
| 4                                                      | 36 (19.7)                       | 1 (16.7)                                                          | 0 (0.0)                                                                                      |
| 5                                                      | 14 (7.7)                        | 0 (0.0)                                                           | 1 (20.0)                                                                                     |
| 6                                                      | 3 (1.6)                         | -                                                                 | -                                                                                            |
| 7                                                      | 1 (0.5)                         | -                                                                 | -                                                                                            |
| Mean (SD)                                              | 2.5 (1.6)                       | 2.0 (1.4)                                                         | 3.0 (1.4)                                                                                    |
| Prestroke HAS-BLED score                               |                                 |                                                                   |                                                                                              |
| 0                                                      | 28 (15.3)                       | 2 (33.3)                                                          | 1 (20.0)                                                                                     |
| 1                                                      | 90 (49.2)                       | 3 (50.0)                                                          | 3 (60.0)                                                                                     |
| 2                                                      | 50 (27.3)                       | 1 (16.7)                                                          | 1 (20.0)                                                                                     |
| 3                                                      | 13 (7.1)                        | -                                                                 | -                                                                                            |
| 4                                                      | 2 (1.1)                         | -                                                                 | -                                                                                            |
| Mean (SD)                                              | 1.3 (0.9)                       | 0.8 (0.8)                                                         | 1.0 (0.7)                                                                                    |
| Paroxysmal atrial fibrillation, n (%)                  | 49 (26.8)                       | 2 (28.6)                                                          | 2 (40.0)                                                                                     |
| Prior VKA use <sup>†</sup>                             | 75 (41.0)                       | 3 (42.9)                                                          | 4 (80.0)                                                                                     |
| Risk factor, n (%)                                     |                                 |                                                                   |                                                                                              |

|                                            |              |              |              |
|--------------------------------------------|--------------|--------------|--------------|
| Hypertension                               | 117 (63.9)   | 4 (57.1)     | 3 (60.0)     |
| Diabetes mellitus*                         | 34 (18.6)    | 3 (42.9)     | 2 (40.0)     |
| Hyperlipidemia                             | 34 (18.6)    | 2 (28.6)     | 0 (0.0)      |
| Coronary artery disease                    | 25 (13.7)    | 0 (0.0)      | 1 (20.0)     |
| Baseline neuroimaging, n (%)               |              |              |              |
| CT                                         | 130 (71.0)   | 4 (57.1)     | 4 (80.0)     |
| MRI                                        | 183 (100.0)  | 7 (100.0)    | 5 (100.0)    |
| DWI                                        | 182 (99.5)   | 7 (100.0)    | 5 (100.0)    |
| FLAIR                                      | 182 (99.5)   | 7 (100.0)    | 5 (100.0)    |
| GRE                                        | 166 (90.7)   | 7 (100.0)    | 4 (80.0)     |
| SWI                                        | 18 (9.8)     | 0 (0.0)      | 1 (20.0)     |
| Others                                     | 38 (20.8)    | 1 (14.3)     | 1 (20.0)     |
| Blood pressure at entry (mm Hg), mean (SD) |              |              |              |
| Systolic                                   | 130.0 (18.2) | 122.6 (19.2) | 129.6 (19.9) |
| Diastolic                                  | 77.1 (11.3)  | 77.7 (11.0)  | 77.4 (12.4)  |
| Heart rate, mean (SD)                      | 83.9 (22.9)  | 71.1 (13.9)  | 78.4 (7.0)   |
| Serum creatinine (mg/dL), mean (SD)        | 0.89 (0.24)  | 0.92 (0.34)  | 0.76 (0.12)  |
| Concomitant antiplatelet use               | 57 (31.1)    | 1 (14.3)     | 1 (20.0)     |
| Single antiplatelet                        | 48 (26.2)    | 0 (0.0)      | 0 (0.0)      |
| Aspirin                                    | 36 (19.7)    | 0 (0.0)      | 0 (0.0)      |
| Clopidogrel                                | 9 (4.9)      | 0 (0.0)      | 0 (0.0)      |
| Others                                     | 3 (1.6)      | 0 (0.0)      | 0 (0.0)      |
| Dual antiplatelet                          | 9 (4.9)      | 1 (14.3)     | 1 (20.0)     |



**eTable 4.** Sensitivity Analyses

1) Sensitivity analyses for the primary endpoint including all patients who received the study drug

|               | Rivaroxaban<br>(N=98) | Warfarin<br>(N=90) | <i>P</i> -<br>value <sup>†</sup> | Risk Difference<br>(95% CI) | Relative Risk<br>(95% CI) |
|---------------|-----------------------|--------------------|----------------------------------|-----------------------------|---------------------------|
| Scenario<br>1 | 50 (51.0)             | 50 (55.6)          | 0.53                             | -4.54 (-18.78 -<br>9.80)    | 0.92 (0.70 -<br>1.20)     |
| Scenario<br>2 | 47 (48.0)             | 48 (53.3)          | 0.46                             | -5.37 (-19.60 -<br>9.01)    | 0.90 (0.68 -<br>1.19)     |

<sup>†</sup>P-value by Chi-square test

Scenario 1: All subjects who did not undergo follow-up MRI were assumed to have a primary outcome event

Scenario 2: All subjects who did not undergo follow-up MRI were assumed not to have a primary outcome event

2) Sensitivity analyses of the ITT population

Of the patients who were included in the ITT population and were evaluated for the primary endpoint (recurrent ischemic lesion or new intracranial hemorrhage), in the warfarin group, recurrent ischemic lesion on 4-week MRI was not evaluated in one patient (indicated as patient 1 in table below), and new intracranial hemorrhage on 4-week MRI was not evaluated in another patient (indicated as patient 2 in table below).

|              | Initial MRI<br>obtained | 4-week<br>MRI<br>obtained | Finding                                       | Decision                                                            |
|--------------|-------------------------|---------------------------|-----------------------------------------------|---------------------------------------------------------------------|
| Patient<br>1 | DWI                     | FLAIR,<br>GRE             | No intracranial<br>bleeding on 4-<br>week GRE | Primary endpoint: no<br>Recurrent ischemic lesion: not<br>evaluable |

|           |            |            |                                        |                                                                                                     |
|-----------|------------|------------|----------------------------------------|-----------------------------------------------------------------------------------------------------|
|           |            |            |                                        | New intracranial bleeding: no                                                                       |
| Patient 2 | DWI, FLAIR | FLAIR, GRE | New ischemic lesion on follow-up FLAIR | Primary endpoint: yes<br>Recurrent ischemic lesion: yes<br>New intracranial bleeding: not evaluable |

Therefore, in the warfarin group in Table 2, the percentage of recurrent stroke lesion was 35.6% (= [31/87] x 100), and the percentage of intracranial hemorrhage on 4-week MRI was 28.7% (= [25/87] x 100).

### 2-1) Sensitivity analyses for the primary endpoint

| Intracranial hemorrhage or recurrent ischemic lesion on 4-week MRI (primary endpoint) | Rivaroxaban group (N=95) | Warfarin group (N=88) | P-value† | Risk Difference (95% CI) | Relative Risk (95% CI) |
|---------------------------------------------------------------------------------------|--------------------------|-----------------------|----------|--------------------------|------------------------|
| Scenario 1                                                                            | 47 (49.5)                | 49 (55.7)             | 0.401    | -6.21 (-20.63 - 8.36)    | 0.89 (0.67 - 1.17)     |
| Scenario 2                                                                            | 47 (49.5)                | 49 (55.7)             | 0.401    | -6.21 (-20.63 - 8.36)    | 0.89 (0.67 - 1.17)     |
| Scenario 3                                                                            | 47 (49.5)                | 48 (54.5)             | 0.493    | -5.07 (-19.52 - 9.49)    | 0.91 (0.69 - 1.20)     |
| Scenario 4                                                                            | 47 (49.5)                | 48 (54.5)             | 0.493    | -5.07 (-19.52 - 9.49)    | 0.91 (0.69 - 1.20)     |

†P-value by Chi-square test

Scenario 1: Assuming that the patient who were not evaluable for recurrent ischemic lesion had recurrent ischemic lesion and the other patient who were not evaluable for new intracranial hemorrhage had new intracranial hemorrhage.

Scenario 2: Assuming that the patient who were not evaluable for recurrent ischemic lesion had recurrent ischemic lesion and the other patient who were not evaluable for new

intracranial hemorrhage did not have new intracranial hemorrhage.

Scenario 3: Assuming that the patient who were not evaluable for recurrent ischemic lesion did not have recurrent ischemic lesion and the other patient who were not evaluable for new intracranial hemorrhage had new intracranial hemorrhage.

Scenario 4: Assuming that the patient who were not evaluable for recurrent ischemic lesion did not have recurrent ischemic lesion and the other patient who were not evaluable for new intracranial hemorrhage did not have new intracranial hemorrhage.

2-2) Sensitivity analyses for the secondary endpoint of recurrent ischemic lesion on 4-week MRI in ITT population

| Recurrent ischemic lesion on 4-week MRI | Rivaroxaban group (N=95) | Warfarin group (N=88) | P-value† | Risk Difference (95% CI) | Relative Risk (95% CI) |
|-----------------------------------------|--------------------------|-----------------------|----------|--------------------------|------------------------|
| Scenario 1                              | 28 (29.5)                | 32 (36.4)             | 0.321    | -6.89 (-21.18 - 7.70)    | 0.81 (0.53 - 1.23)     |
| Scenario 2                              | 28 (29.5)                | 31 (35.2)             | 0.405    | -5.75 (-20.06 - 8.83)    | 0.84 (0.55 - 1.27)     |

†P-value by Chi-square test

Scenario 1: Assuming that the patient who were not evaluable for recurrent ischemic lesion had recurrent ischemic lesion.

Scenario 2: Assuming that the patient who were not evaluable for recurrent ischemic lesion did not have recurrent ischemic lesion.

2-3) Sensitivity analyses for the secondary endpoint of new intracranial hemorrhage on 4-week MRI in ITT population

| Intracranial hemorrhage on 4-week MRI | Rivaroxaban group (N=95) | Warfarin group (N=88) | P-value† | Risk Difference (95% CI) | Relative Risk (95% CI) |
|---------------------------------------|--------------------------|-----------------------|----------|--------------------------|------------------------|
| Scenario 1                            | 30 (31.6)                | 26 (29.5)             | 0.766    | 2.03 (-12.44 - 16.50)    | 1.07 (0.69 - 1.66)     |
| Scenario 2                            | 30 (31.6)                | 25 (28.4)             | 0.640    | 3.17 (-11.34 - 17.61)    | 1.11 (0.71 - 1.73)     |

†P-value by Chi-square test

Scenario 1: Assuming that the patient who were not evaluable for new intracranial hemorrhage had new intracranial hemorrhage.

Scenario 2: Assuming that the patient who were not evaluable for new intracranial hemorrhage did not have new intracranial hemorrhage.

**eTable 5.** Endpoints in the Per-Protocol Population

|                                                                                       | Rivaroxaban group (N=93) | Warfarin group (N=87) | Risk difference (95% CI) | Relative risk (95% CI) | P value | Adjusted relative risk (95% CI) | P value |
|---------------------------------------------------------------------------------------|--------------------------|-----------------------|--------------------------|------------------------|---------|---------------------------------|---------|
| Intracranial hemorrhage or recurrent ischemic lesion on 4-week MRI (primary endpoint) | 46 (49.5)                | 47 (54.0)             | -4.56 (-19.17–10.15)     | 0.92 (0.69–1.21)       | 0.5406  | 0.96 (0.72–1.28)                | 0.7929  |
| Recurrent ischemic lesion on 4-week MRI                                               | 27 (29.0)                | 30 (34.9)             | -5.85 (-20.33–8.87)      | 0.83 (0.54–1.28)       | 0.4011  | 0.86 (0.55–1.32)                | 0.4849  |
| Intracranial hemorrhage on 4-week MRI                                                 | 30 (32.3)                | 24 (27.9)             | 4.35 (-10.30–18.90)      | 1.16 (0.74–1.81)       | 0.5263  | 1.22 (0.77–1.95)                | 0.3961  |
| Clinical recurrent ischemic stroke                                                    | 0 (0)                    | 1 (1.1)               | -1.15 (-15.77–13.49)     | -                      | 0.4833  | -                               | -       |
| Symptomatic hemorrhagic conversion or hemorrhagic stroke                              | 0 (0)                    | 0 (0)                 | -                        | -                      | >0.999  | -                               | -       |
| Major bleeding                                                                        | 1 (1.1)                  | 0 (0)                 | 1.08 (-13.58–15.68)      | -                      | >0.999  | -                               | -       |
| Systemic embolism                                                                     | 0 (0)                    | 0 (0)                 | -                        | -                      | >0.999  | -                               | -       |
| Acute coronary syndrome                                                               | 0 (0)                    | 0 (0)                 | -                        | -                      | >0.999  | -                               | -       |
| Composite of stroke, MI, or vascular death                                            | 0 (0)                    | 1 (1.1)               | -1.15 (-15.77–13.49)     | -                      | 0.4833  | -                               | -       |
| Composite of stroke, MI,                                                              | 1 (1.1)                  | 1 (1.1)               | -0.07 (-14.72–           | 0.94 (0.06–            | >0.999  | -                               | -       |

|                                                  |               |               |                     |                  |         |                  |        |
|--------------------------------------------------|---------------|---------------|---------------------|------------------|---------|------------------|--------|
| vascular death, or major bleeding                |               |               | 14.54)              | 14.73)           |         |                  |        |
| Composite of clinical ischemic events            | 0 (0)         | 1 (1.1)       | -1.15 (-15.8–13.49) | -                | 0.4833  | -                | -      |
| Duration of hospitalization (days), median (IQR) | 4.0 (2.0–6.0) | 6.0 (4.0–8.0) | -                   | -                | <0.0001 | -                | 0.0051 |
| mRS 0-1 at 4 weeks                               | 78 (83.9)     | 64 (74.4)     | 8.58 (-6.16–23.00)  | 1.11 (0.96–1.30) | 0.1547  | 1.04 (0.82–1.31) | 0.7543 |

Data are n (%) unless otherwise stated. MI=myocardial infarction  
Adjusted for age, sex, initial ischemic lesion volume on diffusion-weighted image, diabetes, prior vitamin K antagonist, concomitant antiplatelet use, and center

**eTable 6.** Characteristics of New Ischemic Lesion in the Modified ITT Population

|                                                           | Rivaroxaban group<br>(N=95) | Warfarin group<br>(N=88) | <i>P</i> -value <sup>†</sup> |
|-----------------------------------------------------------|-----------------------------|--------------------------|------------------------------|
| Size in diameter >10 mm, n (%)                            | 12 (12.6)                   | 14 (15.9)                | 0.6370                       |
| Multiplicity, n (%)                                       | 19 (20.0)                   | 8 (9.2)                  | 0.0405                       |
| <sup>†</sup> <i>P</i> -value by Pearson's chi-square test |                             |                          |                              |

**eTable 7.** Characteristics of New Intracranial Hemorrhage in the Modified ITT

Population

|                                                                                                              | Rivaroxaban group<br>(N=95) | Warfarin group<br>(N=87) | <i>P</i> -value <sup>†</sup> |
|--------------------------------------------------------------------------------------------------------------|-----------------------------|--------------------------|------------------------------|
|                                                                                                              |                             |                          | 0.1971                       |
| No HT                                                                                                        | 65 (68.4)                   | 62 (71.3)                |                              |
| HT type I                                                                                                    | 18 (18.9)                   | 10 (11.5)                |                              |
| HT type II                                                                                                   | 11 (11.6)                   | 10 (11.5)                |                              |
| PH                                                                                                           | 1 (1.1)                     | 5 (5.7)                  |                              |
| <sup>†</sup> <i>P</i> -value by Fisher's exact test to compare the whole distribution between the two groups |                             |                          |                              |

HT=hemorrhage infarction. PH=parenchymal haematoma.

HT type I: small hyperdense petechiae; HT type II: more confluent hyperdensity throughout the infarct zone without mass effect; PH: homogeneous hyperdensity with mass effect.

In the warfarin group, there was one missing value because one patient had only follow-up GRE without initial GRE/SWI.



**eTable 8.** Subgroup Analysis for Primary Endpoint in the Modified ITT Population

|                                                      | N   | Rivaroxa<br>ban | Warfarin     | <i>P</i> -<br>value <sup>†</sup> | Relative Risk<br>(95% CI) | <i>P</i> -<br>value <sup>‡</sup> |
|------------------------------------------------------|-----|-----------------|--------------|----------------------------------|---------------------------|----------------------------------|
| Age                                                  |     |                 |              |                                  |                           | 0.9626                           |
| ≤70 yr                                               | 95  | 29<br>(54.7)    | 26<br>(61.9) | 0.4810                           | 0.88 (0.63–1.24)          |                                  |
| >70 yr                                               | 88  | 18<br>(42.9)    | 22<br>(47.8) | 0.6401                           | 0.90 (0.56–1.42)          |                                  |
| Sex                                                  |     |                 |              |                                  |                           | 0.2534                           |
| Male                                                 | 107 | 27<br>(49.1)    | 32<br>(61.5) | 0.1957                           | 0.80 (0.57–1.13)          |                                  |
| Female                                               | 76  | 20<br>(50.0)    | 16<br>(44.4) | 0.6282                           | 1.13 (0.70–1.82)          |                                  |
| Prior VKA use                                        |     |                 |              |                                  |                           | 0.1928                           |
| No                                                   | 108 | 25<br>(44.6)    | 30<br>(57.7) | 0.1753                           | 0.77 (0.53–1.12)          |                                  |
| Yes                                                  | 75  | 22<br>(56.4)    | 18<br>(50.0) | 0.5783                           | 1.13 (0.74–1.73)          |                                  |
| Prestroke CHA <sub>2</sub> DS <sub>2</sub> -<br>VASc |     |                 |              |                                  |                           | 0.8027                           |
| ≤1                                                   | 118 | 33<br>(55.9)    | 35<br>(59.3) | 0.7095                           | 0.94 (0.69–1.29)          |                                  |
| ≥2                                                   | 65  | 14<br>(38.9)    | 13<br>(44.8) | 0.6291                           | 0.87 (0.49–1.54)          |                                  |
| Prestroke HAS-BLED                                   |     |                 |              |                                  |                           | 0.8329                           |
| ≤2                                                   | 92  | 25<br>(61.0)    | 33<br>(64.7) | 0.7126                           | 0.94 (0.69–1.29)          |                                  |
| ≥3                                                   | 91  | 22<br>(40.7)    | 15<br>(40.5) | 0.9848                           | 1.00 (0.61–1.67)          |                                  |
| Baseline DWI volume                                  |     |                 |              |                                  |                           | 0.3007                           |
| ≤3.53 cm <sup>3</sup>                                | 91  | 26<br>(49.1)    | 17<br>(44.7) | 0.6840                           | 1.10 (0.70–1.72)          |                                  |
| >3.53 cm <sup>3</sup>                                | 92  | 21<br>(50.0)    | 31<br>(62.0) | 0.2475                           | 0.81 (0.56–1.17)          |                                  |
| Concomitant<br>antiplatelet use                      |     |                 |              |                                  |                           | 0.6851                           |

|                                                                                                                              |         |              |              |        |                  |        |
|------------------------------------------------------------------------------------------------------------------------------|---------|--------------|--------------|--------|------------------|--------|
| No                                                                                                                           | 12<br>6 | 31<br>(50.8) | 35<br>(53.8) | 0.7339 | 0.94 (0.68–1.32) |        |
| Yes                                                                                                                          | 57      | 16<br>(47.1) | 13<br>(56.5) | 0.4832 | 0.83 (0.50–1.38) |        |
| Creatinine Clearance                                                                                                         |         |              |              |        |                  | 0.6601 |
| <50 mL/min                                                                                                                   | 35      | 5<br>(31.3)  | 8<br>(42.1)  | 0.5079 | 0.74 (0.30–1.82) |        |
| ≥50 mL/min                                                                                                                   | 14<br>8 | 42<br>(53.2) | 40<br>(58.0) | 0.5573 | 0.92 (0.69–1.22) |        |
| <sup>†</sup> P-value by Chi-square test or Fisher's exact test as appropriate<br><sup>‡</sup> P-value for interaction effect |         |              |              |        |                  |        |

VKA=vitamin K antagonist

**eTable 9.** Subgroup Analysis for Recurrent Ischemic Lesion in the Modified ITT Population

|                                                  | N   | Rivaroxaban  | Warfarin     | <i>P</i> -value <sup>†</sup> | Relative Risk (95% CI) | <i>P</i> -value <sup>‡</sup> |
|--------------------------------------------------|-----|--------------|--------------|------------------------------|------------------------|------------------------------|
| Age                                              |     |              |              |                              |                        | 0.4019                       |
| ≤70 yr                                           | 94  | 17<br>(32.1) | 19<br>(46.3) | 0.1582                       | 0.69 (0.41–1.15)       |                              |
| >70 yr                                           | 88  | 11<br>(26.2) | 12<br>(26.1) | 0.9912                       | 1.00 (0.50–2.03)       |                              |
| Sex                                              |     |              |              |                              |                        | 0.0587                       |
| Male                                             | 106 | 14<br>(25.5) | 22<br>(43.1) | 0.0548                       | 0.59 (0.34–1.02)       |                              |
| Female                                           | 76  | 14<br>(35.0) | 9<br>(25.0)  | 0.3434                       | 1.40 (0.69–2.84)       |                              |
| Prior VKA use                                    |     |              |              |                              |                        | 0.0422                       |
| No                                               | 107 | 12<br>(21.4) | 20<br>(39.2) | 0.0447                       | 0.55 (0.30–1.00)       |                              |
| Yes                                              | 75  | 16<br>(41.0) | 11<br>(30.6) | 0.3453                       | 1.34 (0.72–2.50)       |                              |
| Prestroke CHA <sub>2</sub> DS <sub>2</sub> -VASc |     |              |              |                              |                        | 0.3698                       |
| ≤1                                               | 118 | 20<br>(33.9) | 21<br>(35.6) | 0.8467                       | 0.95 (0.58–1.56)       |                              |
| ≥2                                               | 64  | 8<br>(22.2)  | 10<br>(35.7) | 0.2337                       | 0.62 (0.28–1.37)       |                              |
| Prestroke HAS-BLED                               |     |              |              |                              |                        | 0.3152                       |
| ≤2                                               | 91  | 12<br>(29.3) | 21<br>(42.0) | 0.2088                       | 0.70 (0.39–1.24)       |                              |
| ≥3                                               | 91  | 16<br>(29.6) | 10<br>(27.0) | 0.7872                       | 1.10 (0.56–2.14)       |                              |
| Baseline DWI volume                              |     |              |              |                              |                        | 0.5328                       |
| ≤3.53 cm <sup>3</sup>                            | 91  | 17<br>(32.1) | 13<br>(34.2) | 0.8308                       | 0.94 (0.52–1.69)       |                              |
| >3.53 cm <sup>3</sup>                            | 91  | 11<br>(26.2) | 18<br>(36.7) | 0.2819                       | 0.71 (0.38–1.33)       |                              |

|                                                                                                        |         |              |              |        |                  |        |
|--------------------------------------------------------------------------------------------------------|---------|--------------|--------------|--------|------------------|--------|
| Concomitant antiplatelet use                                                                           |         |              |              |        |                  | 0.7910 |
| No                                                                                                     | 12<br>6 | 17<br>(27.9) | 23<br>(35.4) | 0.3651 | 0.79 (0.47–1.33) |        |
| Yes                                                                                                    | 56      | 11<br>(32.4) | 8<br>(36.4)  | 0.7569 | 0.89 (0.43–1.86) |        |
| Creatinine Clearance                                                                                   |         |              |              |        |                  | 0.5057 |
| <50 ml/min                                                                                             | 35      | 4<br>(25.0)  | 4<br>(21.1)  | 1.0000 | 1.19 (0.35–4.01) |        |
| ≥50 ml/min                                                                                             | 14<br>7 | 24<br>(30.4) | 27<br>(39.7) | 0.2362 | 0.77 (0.49–1.19) |        |
| † P-value by Chi-square test or Fisher's exact test as appropriate<br>‡ P-value for interaction effect |         |              |              |        |                  |        |

**eTable 10.** Subgroup Analysis for Intracranial Bleeding in the Modified ITT Population

|                                                  | N   | Rivaroxaban | Warfarin  | <i>P</i> -value <sup>†</sup> | Relative Risk (95% CI) | <i>P</i> -value <sup>‡</sup> |
|--------------------------------------------------|-----|-------------|-----------|------------------------------|------------------------|------------------------------|
| Age                                              |     |             |           |                              |                        | 0.0669                       |
| ≤70 yr                                           | 94  | 22 (41.5)   | 11 (26.8) | 0.1392                       | 1.55 (0.85–2.81)       |                              |
| >70 yr                                           | 88  | 8 (19.0)    | 14 (30.4) | 0.2179                       | 0.63 (0.29–1.34)       |                              |
| Sex                                              |     |             |           |                              |                        | 0.5043                       |
| Male                                             | 106 | 20 (36.4)   | 15 (29.4) | 0.4470                       | 1.24 (0.71–2.14)       |                              |
| Female                                           | 76  | 10 (25.0)   | 10 (27.8) | 0.7836                       | 0.90 (0.42–1.91)       |                              |
| Prior VKA use                                    |     |             |           |                              |                        | 0.7853                       |
| No                                               | 107 | 19 (33.9)   | 15 (29.4) | 0.6162                       | 1.15 (0.66–2.02)       |                              |
| Yes                                              | 75  | 11 (28.2)   | 10 (27.8) | 0.9672                       | 1.02 (0.49–2.10)       |                              |
| Prestroke CHA <sub>2</sub> DS <sub>2</sub> -VASc |     |             |           |                              |                        | 0.7578                       |
| ≤1                                               | 117 | 22 (37.3)   | 20 (34.5) | 0.7518                       | 1.08 (0.67–1.76)       |                              |
| ≥2                                               | 65  | 8 (22.2)    | 5 (17.2)  | 0.6178                       | 1.29 (0.47–3.52)       |                              |
| Prestroke HAS-BLED                               |     |             |           |                              |                        | 0.4485                       |
| ≤2                                               | 91  | 19 (46.3)   | 17 (34.0) | 0.2309                       | 1.36 (0.82–2.26)       |                              |
| ≥3                                               | 91  | 11 (20.4)   | 8 (21.6)  | 0.8853                       | 0.94 (0.42–2.12)       |                              |
| Baseline DWI volume                              |     |             |           |                              |                        | 0.1944                       |
| ≤3.53 cm <sup>3</sup>                            | 91  | 15 (28.3)   | 6 (15.8)  | 0.1624                       | 1.79 (0.77–4.19)       |                              |
| >3.53 cm <sup>3</sup>                            | 91  | 15 (35.7)   | 19 (38.8) | 0.7635                       | 0.92 (0.54–1.58)       |                              |
| Concomitant antiplatelet use                     |     |             |           |                              |                        | 0.3092                       |
| No                                               | 125 | 18 (29.5)   | 20 (31.3) | 0.8324                       | 0.94 (0.55–1.61)       |                              |
| Yes                                              | 57  | 12 (35.3)   | 5 (21.7)  | 0.2724                       | 1.62 (0.66–3.99)       |                              |
| Creatinine Clearance                             |     |             |           |                              |                        | 0.1205                       |

|                                                                                                        |         |           |           |        |                  |  |
|--------------------------------------------------------------------------------------------------------|---------|-----------|-----------|--------|------------------|--|
| <50 ml/min                                                                                             | 35      | 1 (6.3)   | 5 (26.3)  | 0.1874 | 0.24 (0.03–1.83) |  |
| ≥50 ml/min                                                                                             | 14<br>7 | 29 (36.7) | 20 (29.4) | 0.3494 | 1.25 (0.78–1.99) |  |
| † P-value by Chi-square test or Fisher's exact test as appropriate<br>‡ P-value for interaction effect |         |           |           |        |                  |  |

**eFigure 1. Onset to Randomization**

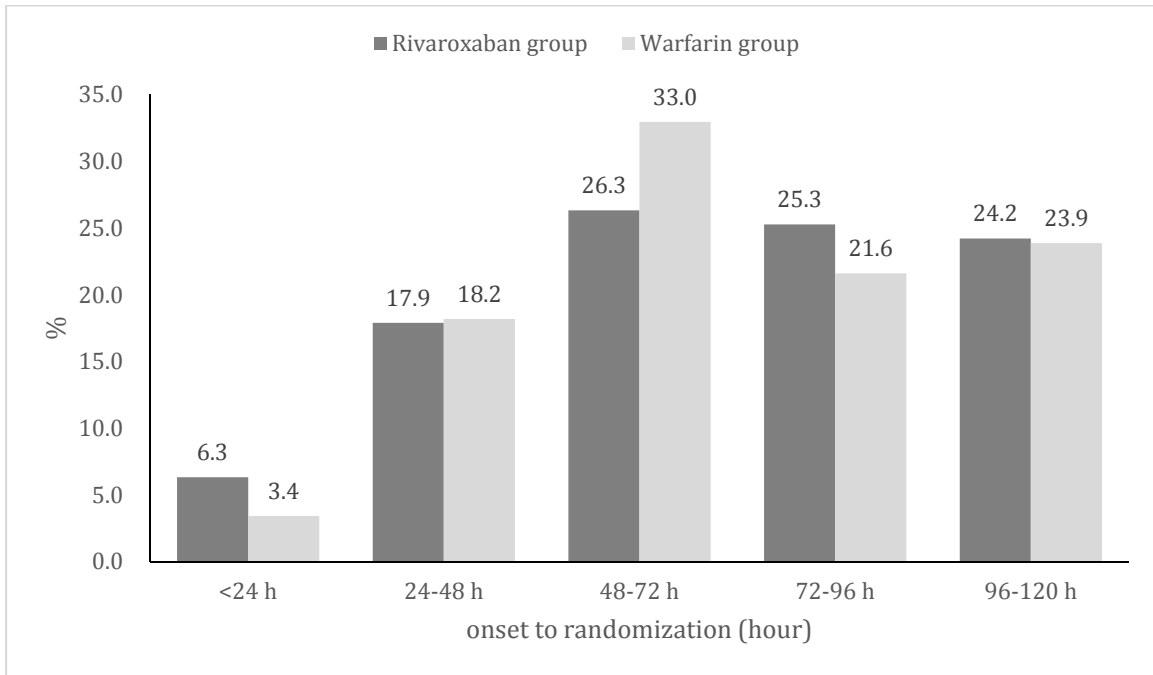

**eFigure 2.** INR Values in the Warfarin Group

A. Mean INR

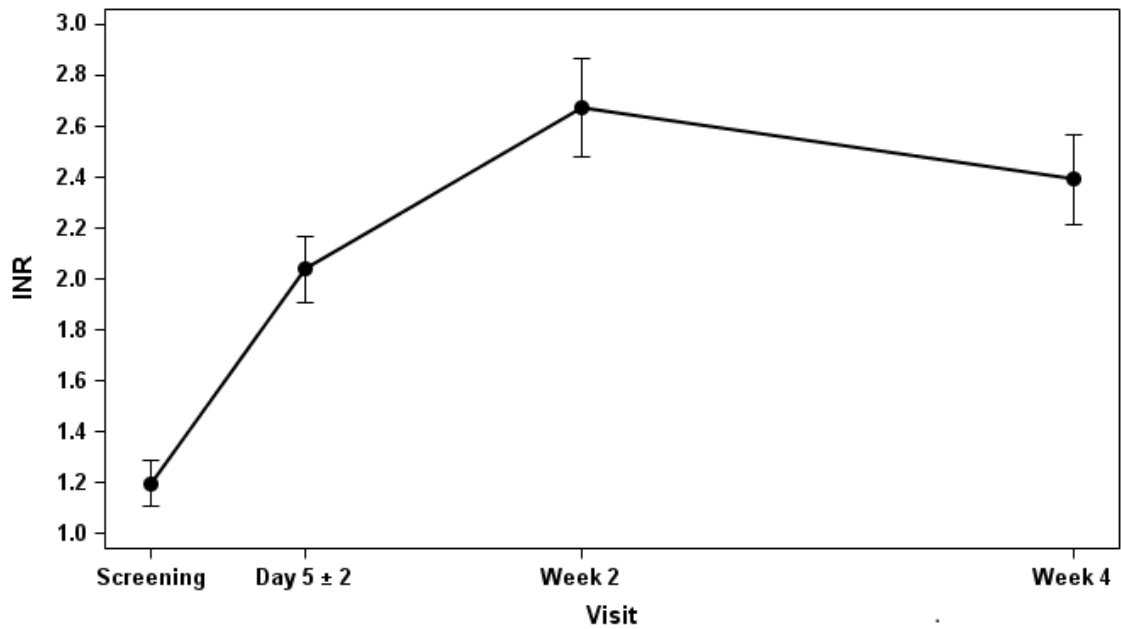

B. Proportion of achieving target INR of 2.0–3.0

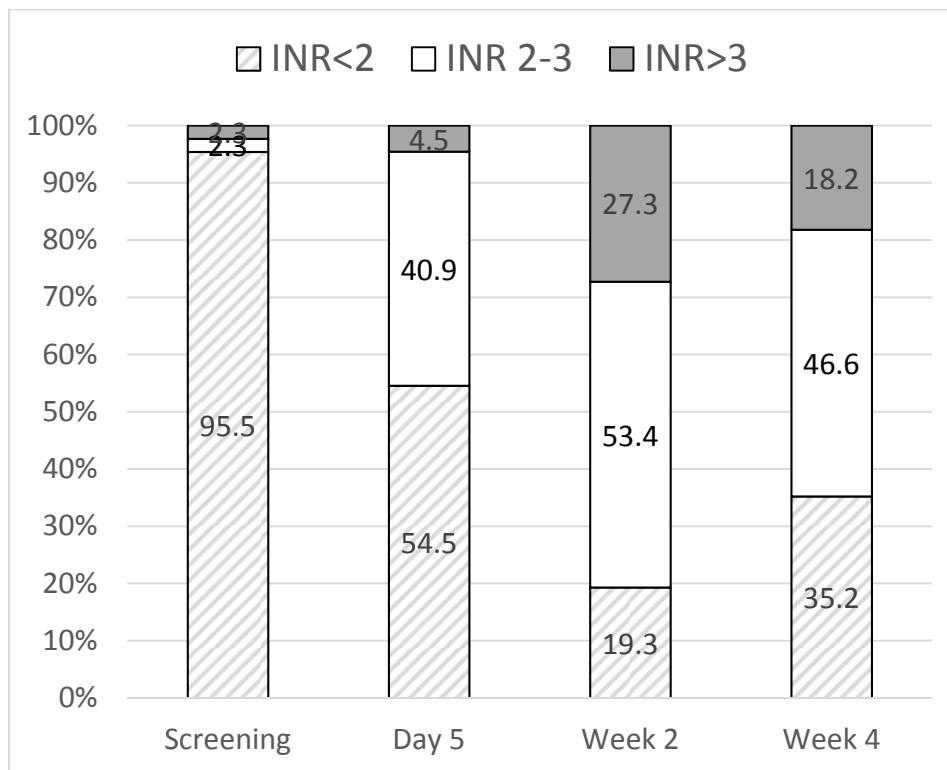

Supplement: jamaneurol-74-1206-s002.pdf [file jamaneurol-74-1206-s002.pdf]
