# Supplementary material
Source: PubMed Central journal article supplement (PMC5710243)
Supplement: jamaneurol-74-1206-s001.pdf [file jamaneurol-74-1206-s001.pdf]

# CLINICAL STUDY PROTOCOL

1  
2  
3  
4  
5  
6 **Local, Multicenter, Phase II, Exploratory Clinical Study to Assess the Effects of Xarelto**  
7 **(Rivaroxaban) Versus Warfarin on Ischemia, Bleeding, and Hospital Stay in Acute Cerebral**  
8 **Infarction Patients with Non-valvular Atrial Fibrillation**  
9  
10  
11  
12

13 **Protocol Number: LMI-2013-1013 (Triple AXEL)**

14 **Version: version 4.0**

15 **Date: 26 / Oct / 2015**  
16  
17

## 18 **Confidential**

Proprietary Notice: Information in the document and any concept or information created during the study are considered proprietary property and cannot be disclosed in full or in part without written permission from the sponsor.

Statement of Ethics: This study will be performed in accordance with Good Clinical Practice (GCP). Compliance with this standard means to guarantee public assurance that the rights, safety, and well-being of study subjects are protected, consistent with the principles that originated in the Declaration of Helsinki.

19

20

21 **Signature Page**

22

23

**Protocol Number: LMI-2013-1013 (Triple AXEL)**

24

25 I have fully reviewed the protocol and agree to comply with the procedures and contents provided  
26 in the protocol and ensure that this clinical study is carried out according to the International  
27 Conference on Harmonization (ICH) Guidelines, Good Clinical Practice (GCP) Standards,  
28 Declaration of Helsinki, and ethical and legal regulations of the applicable area. I give my consent  
29 to keep confidential all the information developed or obtained in connection with this protocol.

30

31

Signature

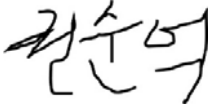

26 / Oct / 2015

Name: Sun U. Kwon

Date

Principal Investigator

32

Signature



26 / Oct / 2015

Name: Keun-Sik Hong

Date

Principal Investigator

33

34

35 **Clinical Study Protocol Synopsis**

|                                                  |                                                                                                                                                                                                                                                                                                                                                                                                                                                                                                                                                                                                                                                                                                                                                                                                                                                                                                                                                                                                                                                                                                                                                                                                                                                                                                                                                                                                                                                                                                                                                                                                                                                                                                                                                                                                              |
|--------------------------------------------------|--------------------------------------------------------------------------------------------------------------------------------------------------------------------------------------------------------------------------------------------------------------------------------------------------------------------------------------------------------------------------------------------------------------------------------------------------------------------------------------------------------------------------------------------------------------------------------------------------------------------------------------------------------------------------------------------------------------------------------------------------------------------------------------------------------------------------------------------------------------------------------------------------------------------------------------------------------------------------------------------------------------------------------------------------------------------------------------------------------------------------------------------------------------------------------------------------------------------------------------------------------------------------------------------------------------------------------------------------------------------------------------------------------------------------------------------------------------------------------------------------------------------------------------------------------------------------------------------------------------------------------------------------------------------------------------------------------------------------------------------------------------------------------------------------------------|
| <b>Study Title</b>                               | Local, Multicenter, Phase II, Exploratory Clinical Study to Assess the Effects of Xarelto (Rivaroxaban) Versus Warfarin on Ischemia, Bleeding, and Hospital Stay in Acute Cerebral Infarction Patients with Non-valvular Atrial Fibrillation                                                                                                                                                                                                                                                                                                                                                                                                                                                                                                                                                                                                                                                                                                                                                                                                                                                                                                                                                                                                                                                                                                                                                                                                                                                                                                                                                                                                                                                                                                                                                                 |
| <b>Protocol Number</b>                           | LMI-2013-1013 (Triple AXEL)                                                                                                                                                                                                                                                                                                                                                                                                                                                                                                                                                                                                                                                                                                                                                                                                                                                                                                                                                                                                                                                                                                                                                                                                                                                                                                                                                                                                                                                                                                                                                                                                                                                                                                                                                                                  |
| <b>Clinical Phase</b>                            | Phase II (Investigator-Initiated Trial)                                                                                                                                                                                                                                                                                                                                                                                                                                                                                                                                                                                                                                                                                                                                                                                                                                                                                                                                                                                                                                                                                                                                                                                                                                                                                                                                                                                                                                                                                                                                                                                                                                                                                                                                                                      |
| <b>Study Center and Principal Investigator</b>   | <p>Sun-Uck Kwon, Department of Neurology, Asan Medical Center, 88 Olympic-ro 43-gil, Songpa-gu, Seoul, South Korea, 138-736</p> <p>Keun-Sik Hong, Department of Neurology, Inje University Ilsan Paik Hospital, 170 Juhwa-ro, Ilsanseo-gu, Goyang-si, Gyeonggi-do, Korea</p> <p>Man-Seok Park, Department of Neurology, Chonnam National University Hospital, 42 Jebong-ro, Dong-gu, Gwangju, Korea</p> <p>Tae-Jin Song, Department of Neurology, Ewha Womans University Mokdong Hospital, 1071 Anyangcheon-ro, Yangcheon-gu, Seoul, Korea</p> <p>Oh-Young Bang, Department of Neurology, Samsung Medical Center, 50 Irwon-dong, Gangnam-gu, Seoul, Korea 135-710</p> <p>Yong-Won Kim, Department of Neurology, Kyungpook National University Hospital, 130 Dongdeok-ro, Jung-gu, Daegu, Korea</p> <p>Jae-Kwan Cha, Department of Neurology, Dong-A University Hospital 26 Daesingongwon-ro, Seo-gu, Busan, Korea</p> <p>Woo-Keun Seo, Department of Neurology, Korea University Guro hospital, 148 Gurodong-ro, Guro-gu, Seoul, Korea</p> <p>Eung-Gyu Kim, Department of Neurology, Inje University Busan Paik Hospital, 75 Bokji-ro, Busanjin-gu, Busan, Korea</p> <p>Byung-Woo Yoon, Department of Neurology, Seoul National University Hospital, 101 Daehak-ro, Jongno-gu, Seoul, Korea</p> <p>Hyo-Suk Nam, Department of Neurology, Severance Hospital, 50 Yonsei-ro, Seodaemun-gu, Seoul, Korea</p> <p>Kyung-Ho Yu, Department of Neurology, Hallym University Medical Center, 22 Gwanpyeong-ro 170 beon-gil, Dongan-gu, Anyang-si, Gyeonggi-do, Korea</p> <p>Sung Sang Min, Department of Neurology, Pusan National University Hospital, 179 Gudeok-ro, Seo-gu, Busan, Korea</p> <p>Sung-Hwan Ahn, Department of Neurology, Chosun University Hospital, 365 Pilmun-daero, Dong-gu, Gwangju, Korea</p> |
| <b>Contract Research Organization</b>            | Clinical Research Center/Asan Medical Center Academic Research Office                                                                                                                                                                                                                                                                                                                                                                                                                                                                                                                                                                                                                                                                                                                                                                                                                                                                                                                                                                                                                                                                                                                                                                                                                                                                                                                                                                                                                                                                                                                                                                                                                                                                                                                                        |
| <b>Route of Administration of the Study Drug</b> | <p>Investigational product</p> <p>Study group: Bayer Xarelto tablet (10, 15, 20 mg)</p> <p>* Subcutaneous low dose heparin or LMWH can be used at the study doctor's discretion in order to prevent DVT, but it should be discontinued 24 hours before the dose of rivaroxaban.</p>                                                                                                                                                                                                                                                                                                                                                                                                                                                                                                                                                                                                                                                                                                                                                                                                                                                                                                                                                                                                                                                                                                                                                                                                                                                                                                                                                                                                                                                                                                                          |

|                          |                                                                                                                                                                                                                                                                                                                                                                                                                                                                                                                                                                                                                                                                                                                                                                                                                                                                                                                                                                                                                                                                                                                                                                                                                                                                                                                                                                                                                                                                                                                                                                                                                                                                                                                                                                                                                                                                                                                                                                                                                                                                                                                                                                                                                                                                                                                                                                                                                                                                                                                                                  |
|--------------------------|--------------------------------------------------------------------------------------------------------------------------------------------------------------------------------------------------------------------------------------------------------------------------------------------------------------------------------------------------------------------------------------------------------------------------------------------------------------------------------------------------------------------------------------------------------------------------------------------------------------------------------------------------------------------------------------------------------------------------------------------------------------------------------------------------------------------------------------------------------------------------------------------------------------------------------------------------------------------------------------------------------------------------------------------------------------------------------------------------------------------------------------------------------------------------------------------------------------------------------------------------------------------------------------------------------------------------------------------------------------------------------------------------------------------------------------------------------------------------------------------------------------------------------------------------------------------------------------------------------------------------------------------------------------------------------------------------------------------------------------------------------------------------------------------------------------------------------------------------------------------------------------------------------------------------------------------------------------------------------------------------------------------------------------------------------------------------------------------------------------------------------------------------------------------------------------------------------------------------------------------------------------------------------------------------------------------------------------------------------------------------------------------------------------------------------------------------------------------------------------------------------------------------------------------------|
|                          | <p>Control group: Daewha warfarin Tablet (2, 5 mg)</p> <p>(dosed concomitantly with Bayer Aspirin 100 mg QD from randomization day until the first results of INR &gt; 1.7)</p> <p>* Subcutaneous low dose heparin or LMWH can be concomitantly used when INR is ≤ 1.7 at the study doctor's discretion in order to prevent DVT</p>                                                                                                                                                                                                                                                                                                                                                                                                                                                                                                                                                                                                                                                                                                                                                                                                                                                                                                                                                                                                                                                                                                                                                                                                                                                                                                                                                                                                                                                                                                                                                                                                                                                                                                                                                                                                                                                                                                                                                                                                                                                                                                                                                                                                              |
| <b>Target Indication</b> | Acute cerebral infarction or transient ischemic attack associated with non-valvular atrial fibrillation.                                                                                                                                                                                                                                                                                                                                                                                                                                                                                                                                                                                                                                                                                                                                                                                                                                                                                                                                                                                                                                                                                                                                                                                                                                                                                                                                                                                                                                                                                                                                                                                                                                                                                                                                                                                                                                                                                                                                                                                                                                                                                                                                                                                                                                                                                                                                                                                                                                         |
| <b>Study Duration</b>    | 36 months from IRB approval date                                                                                                                                                                                                                                                                                                                                                                                                                                                                                                                                                                                                                                                                                                                                                                                                                                                                                                                                                                                                                                                                                                                                                                                                                                                                                                                                                                                                                                                                                                                                                                                                                                                                                                                                                                                                                                                                                                                                                                                                                                                                                                                                                                                                                                                                                                                                                                                                                                                                                                                 |
| <b>Objectives</b>        | <p>To assess the effects of warfarin or Xarelto (rivaroxaban) after four-week treatment (30 ± 5 days) in acute cerebral infarction or transient ischemic attack with nonvalvular atrial fibrillation based on the independent investigator's brain image interpretation.</p> <p><b>Primary endpoint:</b></p> <p>1) To compare the incidence of intracranial bleeding or recurrent ischemic lesions confirmed by the brain imaging (FLAIR/GRE, or SWI, or if necessary, DWI) after four-week (30 ± 5 days) treatment with Xarelto or warfarin between the two groups</p> <p>* Intracranial bleeding: symptomatic haemorrhage confirmed by CT or MRI or asymptomatic haemorrhage confirmed by GRE or SWI at Week 4 (30 ± 5 days)</p> <p>* Recurrent ischemic lesion: symptomatic cerebral infarction confirmed by the appropriate brain imaging or asymptomatic ischemic lesions confirmed by FLAIR at Week 4 (30 ± 5 days)</p> <p><b>Secondary endpoints:</b></p> <p>1) the incidence of intracranial bleeding confirmed by brain imaging after 4 weeks treatment</p> <p>2) the incidence of recurrent ischemic lesion confirmed by brain imaging after 4 weeks treatment</p> <p>3) the total number of days of neurology division stay after randomization</p> <p>4) the incidence of major bleeding defined by the International Society on Thrombosis and Haemostasis (ISTH)</p> <ul style="list-style-type: none"> <li>- fatal bleeding: death due to bleeding within 30 days</li> <li>- Symptomatic haemorrhage which occurs in a critical area (intracranial, intraspinal, intraocular, pericardial, intra-articular, or intramuscular with compartment syndrome, retroperitoneal).</li> <li>- Overt bleeding causing a fall in haemoglobin level of 2 g/dL or more, or leading to transfusion of two or more units of red blood cell or whole blood</li> </ul> <p>5) the incidence of acute artery syndrome (myocardial infarction or unstable angina)</p> <p>6) the incidence of major vascular events: stroke, myocardial infarction, or vascular death (including bleeding and ischemic vascular events)</p> <p>7) the incidence of major vascular events and major bleeding (defined by the ISTH)</p> <p>8) the incidence of clinical ischemic events: recurrent cerebral infarction, myocardial infarction, other ischemic events requiring vascular intervention and ischemic vascular death</p> <p>9) the difference between the two groups in a score of the mRS (modified Rankin scale) after 4 weeks treatment (30 ± 5 days)</p> |
| <b>Inclusion</b>         | 1) Patients with acute ischemic stroke or transient ischemic attack presumed to be                                                                                                                                                                                                                                                                                                                                                                                                                                                                                                                                                                                                                                                                                                                                                                                                                                                                                                                                                                                                                                                                                                                                                                                                                                                                                                                                                                                                                                                                                                                                                                                                                                                                                                                                                                                                                                                                                                                                                                                                                                                                                                                                                                                                                                                                                                                                                                                                                                                               |

|                                  |                                                                                                                                                                                                                                                                                                                                                                                                                                                                                                                                                                                                                                                                                                                                                                                                                                                                                                                                                                                                                                                                                                                                                                                                                                                                                                                                                                                                                                                                                                                                                                                                                                                                                                                                                                                                                                                                                                                                                                                                                                                                                                                                                                                                                                                                                                                                                                                                                                                                                                                                                                                                                                                                                                                                                                                                                                           |
|----------------------------------|-------------------------------------------------------------------------------------------------------------------------------------------------------------------------------------------------------------------------------------------------------------------------------------------------------------------------------------------------------------------------------------------------------------------------------------------------------------------------------------------------------------------------------------------------------------------------------------------------------------------------------------------------------------------------------------------------------------------------------------------------------------------------------------------------------------------------------------------------------------------------------------------------------------------------------------------------------------------------------------------------------------------------------------------------------------------------------------------------------------------------------------------------------------------------------------------------------------------------------------------------------------------------------------------------------------------------------------------------------------------------------------------------------------------------------------------------------------------------------------------------------------------------------------------------------------------------------------------------------------------------------------------------------------------------------------------------------------------------------------------------------------------------------------------------------------------------------------------------------------------------------------------------------------------------------------------------------------------------------------------------------------------------------------------------------------------------------------------------------------------------------------------------------------------------------------------------------------------------------------------------------------------------------------------------------------------------------------------------------------------------------------------------------------------------------------------------------------------------------------------------------------------------------------------------------------------------------------------------------------------------------------------------------------------------------------------------------------------------------------------------------------------------------------------------------------------------------------------|
| <p><b>Criteria</b></p>           | <p>cardioembolic origin within 5 days from stroke onset (with mild severity: infarct size on DWI less than 1/3 of MCA territory, 1/2 of ACA territory, 1/2 of PCA territory, and 1/2 of one cerebellar hemisphere)</p> <p>2) Patients with atrial fibrillation including paroxysmal atrial fibrillation: atrial fibrillation must be documented by ECG evidence within 30 days before randomization. This could be obtained from a notation in the subject's record (e.g., medical chart, hospital discharge summary).</p> <p>3) Male or Female aged <math>\geq 19</math> years</p> <p>4) Patients who voluntarily give their prior consent to participate in the study</p>                                                                                                                                                                                                                                                                                                                                                                                                                                                                                                                                                                                                                                                                                                                                                                                                                                                                                                                                                                                                                                                                                                                                                                                                                                                                                                                                                                                                                                                                                                                                                                                                                                                                                                                                                                                                                                                                                                                                                                                                                                                                                                                                                               |
| <p><b>Exclusion Criteria</b></p> | <p>1) Patients with chronic renal failure (CrCl &lt; 30 ml/min) or severe hepatic impairment</p> <p>2) Patients with significant haemorrhagic transformation: parenchymal hematoma type I or II by the ECASS definition</p> <p>3) Patients with stroke presumed due to small vessel occlusion: single subcortical infarct in the perforating artery territory</p> <p>4) Patients with large hemispheric or cerebellar infarction (larger than 1/3 of MCA territory, 1/2 of ACA territory, 1/2 of PCA territory, and 1/2 of one cerebellar hemisphere)</p> <p>5) Patients who requires warfarin therapy due to replacement by prosthetic valve</p> <p>6) Patients with active internal bleeding</p> <p>7) Patients considered to have increased risk of bleeding due to a recent history of intracranial or intracerebral bleeding</p> <p>8) Major surgery or major trauma within 30 days before screening that might be associated with increased bleeding risk</p> <p>9) Clinically significant gastrointestinal bleeding within 6 months before screening</p> <p>10) Intravenous tissue plasminogen activator(TPA) dosing or mechanical embolectomy within 48 hours before screening and 'significant haemorrhagic transformation as described above (exclusion criteria 2)' or 'cerebral hemisphere infarction or cerebellar infarction as described above (exclusion criteria 4)': patients achieving successful reperfusion without haemorrhage nor large infarction are eligible for enrollment</p> <p>11) Severe anaemia: hemoglobin &lt;10 g/dL</p> <p>12) Bleeding diathesis; thrombocytopenia (&lt;90,000/<math>\mu</math>L, prolonged PT (INR&gt;1.7)</p> <p>13) Sustained uncontrolled hypertension: SBP &gt;180 mmHg or DBP &gt;100 mmHg</p> <p>14) Severe devastating illness, such as end-stage cancer, hepatic failure; therefore, patients with a life expectancy less than 6 months.</p> <p>15) Patients with planned invasive procedure with potential for uncontrolled bleeding, including major surgery</p> <p>16) The longer period out of 1 month before screening or 5 times of the half-lives of an active ingredients of CYP3A4 inhibitor or P-gp inhibitors, has not passed since the last administration of CYP3A4 and P-gp inhibitors that may increase significantly the pharmacodynamic effect of rivaroxaban or patients who are scheduled to take those medicines during this study: azole antifungal agents including ketoconazole, itraconazole, voriconazole, and posaconazole and HIV protease inhibitors including ritonavir.</p> <p>17) The longer period out of 1 month before screening or 5 times of the half-lives of an active ingredients of CYP3A4 inducer or P-gp inducer has not passed since the last administration of CYP3A4 and P-gp inducers that may significantly decrease the</p> |

|                                                   |                                                                                                                                                                                                                                                                                                                                                                                                                                                                                                                                                                                                                                                                                                                                                                                                                                                                                                                                                                                                                                                                                                                                                                                                                                                                                                                                                                                                                                                                                                                                                                                                                                                                                                                                                |
|---------------------------------------------------|------------------------------------------------------------------------------------------------------------------------------------------------------------------------------------------------------------------------------------------------------------------------------------------------------------------------------------------------------------------------------------------------------------------------------------------------------------------------------------------------------------------------------------------------------------------------------------------------------------------------------------------------------------------------------------------------------------------------------------------------------------------------------------------------------------------------------------------------------------------------------------------------------------------------------------------------------------------------------------------------------------------------------------------------------------------------------------------------------------------------------------------------------------------------------------------------------------------------------------------------------------------------------------------------------------------------------------------------------------------------------------------------------------------------------------------------------------------------------------------------------------------------------------------------------------------------------------------------------------------------------------------------------------------------------------------------------------------------------------------------|
|                                                   | <p>pharmacodynamics effect of rivaroxaban or patients who are scheduled to take those medicines during this study: rifampicin /rifampin, phenytoin, phenobarbital, carbamazepine, and Saint. John’s wort</p> <p>18) Expected long-term use of NSAIDs</p> <p>19) Drug or alcohol abuse</p> <p>20) Patients in whom MRI is prohibited</p> <p>21) Pregnant or lactating women</p> <p>22) Patients who are allergic or hypersensitive to the investigational drugs (rivaroxaban, warfarin, and aspirin) or in whom the drugs are contradicted</p> <p>23) Patients who cannot or are not willing to carry out the procedures required in this study</p> <p>24) Patients who are investigators that are related directly to this study or employees of the center</p> <p>25) Patients who are not willing to use contraception methods during this study</p> <p>26) Patients who participated in another clinical study within 3 months before the first study drug dose or are participating in another clinical study (excluding observational studies; the end of a previous clinical study is defined as the last dosing date of the investigational product on previous study)</p> <p>27) Patients considered ineligible for the study by the investigator due to other reasons including the results of laboratory test</p>                                                                                                                                                                                                                                                                                                                                                                                                                    |
| <p><b>Study Details and Study Methodology</b></p> | <p><b>Study Details</b></p> <p>1) This is the exploratory phase II clinical study in acute cerebral infarction patients or transient ischemic attack patients with non-valvular atrial fibrillation.</p> <p>2) The patients who are eligible at screening visit will be randomized to either the rivaroxaban group or warfarin group in a 1:1 ratio.</p> <p>3) The primary objective of the rivaroxaban group and warfarin group is to compare the incidences of intracranial haemorrhage or recurrent ischemic legions between the two treatment groups based on the brain imaging (FLAIR/GRE, or SWI, or if necessary, DWI) results after 4 weeks (<math>30 \pm 5</math> days) of the first dose.</p> <p>4) The secondary objectives of the rivaroxaban group and warfarin group are:</p> <ul style="list-style-type: none"> <li>- the incidence of intracranial haemorrhage confirmed by brain imaging at Week 4</li> <li>- the incidence of ischemic legions confirmed by brain imaging at Week 4</li> <li>- the total number of days of neurology division hospital stay after randomization</li> <li>- to compare the following occurrences from the first dose to Week 4 (<math>30 \pm 5</math> days) between two groups <ul style="list-style-type: none"> <li>: the incidence of major bleeding</li> <li>: the incidence of acute artery syndrome (myocardial infarction or unstable angina)</li> <li>: the incidence of major vascular events</li> <li>: the incidences of major vascular events and major bleeding</li> <li>: the incidence of clinical ischemic events</li> </ul> </li> <li>- to assess the difference between the two groups in the Modified Rankin Scale (mRS) scores</li> </ul> <p><b>Study Methodology</b></p> |

|                                        |                                                                                                                                                                                                                                                                                                                                                                                                                                                                                                                                                                                                                                                                                                                                                                                                                                                                                                                                                                                                                                                                                                                                                                                                                                                                                                                                                                                                                                                                                                                                                                                                                                                                                                                                                                                                                                                                                                                                                                                                                                                                                                                                                                                                                                                                                |
|----------------------------------------|--------------------------------------------------------------------------------------------------------------------------------------------------------------------------------------------------------------------------------------------------------------------------------------------------------------------------------------------------------------------------------------------------------------------------------------------------------------------------------------------------------------------------------------------------------------------------------------------------------------------------------------------------------------------------------------------------------------------------------------------------------------------------------------------------------------------------------------------------------------------------------------------------------------------------------------------------------------------------------------------------------------------------------------------------------------------------------------------------------------------------------------------------------------------------------------------------------------------------------------------------------------------------------------------------------------------------------------------------------------------------------------------------------------------------------------------------------------------------------------------------------------------------------------------------------------------------------------------------------------------------------------------------------------------------------------------------------------------------------------------------------------------------------------------------------------------------------------------------------------------------------------------------------------------------------------------------------------------------------------------------------------------------------------------------------------------------------------------------------------------------------------------------------------------------------------------------------------------------------------------------------------------------------|
|                                        | <p><b>Rivaroxaban group</b></p> <p>Rivaroxaban 10 mg will be dosed orally once daily from the randomization to Day 5 ± 2. In patients with the estimated CrCl ≥ 45 ml/min at screening, rivaroxaban 15 mg or 20 mg depending on the estimated CrCl at screening will be dosed from Day 6 ± 2 without a special renal function test. In patients with the estimated CrCl &lt; 45 ml/min at screening, rivaroxaban 15 mg or 20 mg once daily depending on the renal function measured at Day 5 ± 2 will be dosed from Day 6 ± 2 to Week 4 (Day 30 ± 5). At Week 4 Visit, patients will have the tests including brain imaging, and can switch to the conventional treatment containing warfarin at the physician's discretion. For safe switch from rivaroxaban to warfarin, rivaroxaban is dosed concomitantly with warfarin for 5 days; after the concomitant use of rivaroxaban and warfarin is continued until the patients receive the safety tests including INR at the OPD after 7 ± 1 days of the last visit (Week 4) or INR becomes ≥ 2.0, it can be switched to warfarin alone. In the latter case, Week 5 Visit can be exempted. In case of continuous use of rivaroxaban after the study period, Week 5 Visit will not be carried out. At post-study visit (Day 44 ± 5), visit or phone monitoring will be carried out to check adverse events.</p> <p><b>Warfarin group</b></p> <p>After randomization, warfarin plus aspirin will be dosed concomitantly (for the subjects who are taking warfarin at randomization and has baseline INR &gt;1.7, warfarin alone will be taken without aspirin). At Day 5 ± 2 days, INR will be checked; when INR &gt; 1.7 is reached, aspirin will be stopped and warfarin alone will be taken. INR will be measured at Week 2 to verify whether the warfarin dose is well maintained, and, if necessary, the dose will be adjusted with a target at INR 2-3. The last dose of the investigational drug will be taken Week 4 (Day 30 ± 5), and the tests including brain imaging will be carried out at the OPD after the last dose of warfarin. Afterwards, warfarin, a conventional treatment, will be maintained. At post-study visit (Day 44 ± 5), visit or phone monitoring will be carried out to check adverse events.</p> |
| <p><b>Number of Trial Subjects</b></p> | <p>Warfarin group: 98 patients<br/>Rivaroxaban group: 98 patients</p> <p><b>Rationale</b></p> <p>This study is not for confirmatory validation of the effects of the two drugs but for exploratory verification to see whether the effects of rivaroxaban is equivalent to those of warfarin. In order to calculate the expected sample size with the 5% (one-sided) significance level and 80% power:</p> <ol style="list-style-type: none"> <li>1) 89 subjects are required per group for hypothesis testing if it is assumed the incidence of intracranial bleeding or recurrent ischemic lesions is 25% and the least significant difference (LSD) is 15%;</li> <li>2) 56 subjects are required for hypothesis testing if it is assumed the incidence of intracranial bleeding or recurrent ischemic lesions is 30% and the LSD is 20%.</li> </ol> <p>Considering dropout and inaccurate expected incidence of events due to a lack of previous studies, it is planned to recruit 98 subjects per group.</p>                                                                                                                                                                                                                                                                                                                                                                                                                                                                                                                                                                                                                                                                                                                                                                                                                                                                                                                                                                                                                                                                                                                                                                                                                                                               |
| <p><b>Evaluation method</b></p>        | <p><b>Pharmacodynamic Assessment</b></p> <p><b>Brain imaging (FLAIR/GRE or SWI or, if required, DWI):</b> at screening, Week 4, and at the investigator's discretion</p>                                                                                                                                                                                                                                                                                                                                                                                                                                                                                                                                                                                                                                                                                                                                                                                                                                                                                                                                                                                                                                                                                                                                                                                                                                                                                                                                                                                                                                                                                                                                                                                                                                                                                                                                                                                                                                                                                                                                                                                                                                                                                                       |

|                                    |                                                                                                                                                                                                                                                                                                                                                                                                                                                                                                                                                                                                                                                                                                                                                                                                                                                                                                                                                                                                                                                                                                                                                                                                                                                                                                                                                                                                                                                                                           |
|------------------------------------|-------------------------------------------------------------------------------------------------------------------------------------------------------------------------------------------------------------------------------------------------------------------------------------------------------------------------------------------------------------------------------------------------------------------------------------------------------------------------------------------------------------------------------------------------------------------------------------------------------------------------------------------------------------------------------------------------------------------------------------------------------------------------------------------------------------------------------------------------------------------------------------------------------------------------------------------------------------------------------------------------------------------------------------------------------------------------------------------------------------------------------------------------------------------------------------------------------------------------------------------------------------------------------------------------------------------------------------------------------------------------------------------------------------------------------------------------------------------------------------------|
|                                    | <p><b>Modified Rankin Scale (mRS):</b> at screening, Week 4 and at the investigator's discretion</p> <p><u>Safety Assessment</u></p> <p><b>Vital signs (blood pressure and pulse):</b> at screening, Week 4 and at the investigator's discretion</p> <p><b>Laboratory tests:</b></p> <p><u>Screening, Week 4:</u> CBC, AST, ALT, Glucose, BUN, Serum Cr, PT, APTT, Na, K, Total Cholesterol, hs-CRP</p> <p><u>Day 5*, Week 2**:</u> PT, BUN, Serum Cr</p> <p>Week 5 (applicable to the subjects who should carry out a visit in the rivaroxaban group): PT, BUN, serum Cr. and tests required at the investigator's discretion will be conducted.</p> <p>* Applicable to all warfarin groups; in case of the rivaroxaban group, the patients with CrCl <math>\geq</math> 45ml/min at screening can skip the serum Cr test (the dose of rivaroxaban will be decided based on the result of CrCl at screening).</p> <p>** Only applicable to the warfarin group</p> <p><b>Electrocardiogram (12 lead ECG):</b> at screening</p> <p><b>NIHSS:</b> at screening, Week 4 and at the investigator's discretion</p> <p><b>Adverse events:</b> at the investigator's discretion, from the randomization day to the post-study visit</p>                                                                                                                                                                                                                                                           |
| <p><b>Analysis population</b></p>  | <p>The analysis sets required to assess the efficacy and safety in this study will be compliant with the local and international standards. The efficacy analysis will include both the ITT and PP analysis sets as defined below; the safety analysis will be defined and carried out as below:</p> <p><b>Modified intention to treat analysis set</b></p> <p>The modified ITT is defined as all subjects randomized after giving the consent to participation in the study. However, the subjects who have never taken the investigational products (warfarin and rivaroxaban) or had no efficacy endpoints measured in the ITT set even after taking the investigational products will be excluded from the analysis.</p> <p><b>Per protocol analysis set (optional)</b></p> <p>The subjects in the modified ITT, who do not violate the inclusion/exclusion criteria and have rivaroxaban or warfarin compliance of <math>\geq</math>80% will be included in the analysis.</p> <p><b>Interim analysis</b></p> <p>When a majority of subjects (100) have completed the study, the interim safety analysis will be carried out in order to determine whether or not to continue the study. The safety analysis will be done by an independent statistician. Then the steering committee will be commenced to have the final decision of continuity of the study based on the results of safety analysis. The efficacy analysis will be performed after the completion of the study.</p> |
| <p><b>Statistical Analysis</b></p> | <p>For all the variables used for this study, the frequency and proportion of categorical data will be presented, and the summary statistics of continuous data will be provided using the mean and standard deviation. The basic method for all statistical tests to be used for analyses will be two-sided tests except for the primary endpoints (the recurrent incidence of intracranial bleeding and ischemic lesions). The statistical significance will be tested at a 5% significance level, and, if necessary, a two-sided 95% confidence interval will be provided.</p> <p>If the variables are verified that show the difference between the groups after randomization including age and baseline test results except for efficacy and safety</p>                                                                                                                                                                                                                                                                                                                                                                                                                                                                                                                                                                                                                                                                                                                             |



|  |                                                                                                                            |
|--|----------------------------------------------------------------------------------------------------------------------------|
|  | analyses, a regression model will be introduced which can adjust and analyse the risk or prognostic factors for endpoints. |
|--|----------------------------------------------------------------------------------------------------------------------------|

37 **Terms and Abbreviations**

|        |                                                    |
|--------|----------------------------------------------------|
| ACA    | Anterior Cerebral Artery                           |
| ALT    | Alanine Transaminase                               |
| APTT   | Activated Partial Thromboplastin Time              |
| AST    | Aspartate Transaminase                             |
| BUN    | Blood Urea Nitrogen                                |
| CBC    | Complete blood cell count                          |
| Cr     | Creatinine                                         |
| CrCl   | Creatinine Clearance                               |
| CT     | Computed tomography                                |
| CYP3A4 | Cytochrome P 3A4                                   |
| DBP    | Diastolic blood pressure                           |
| DVT    | Deep vein thrombosis                               |
| DWI    | Diffusion weighted MRI                             |
| ECASS  | European cooperative acute stroke study            |
| ECG    | Electrocardiogram                                  |
| e-CRF  | electronic Case Report Form                        |
| FLAIR  | Fluid attenuated inversion recovery                |
| GRE    | Gradient Recalled Echo                             |
| HCG    | Human chorionic gonadotropin                       |
| HIV    | Human Immunodeficiency Virus                       |
| hs-CRP | High sensitivity-C reactive protein                |
| IIRC   | Independent imaging review center                  |
| INR    | International Normalized Ratio                     |
| IRB    | Institutional Review Board                         |
| ISTH   | International Society on Thrombosis and Hemostasis |
| ITT    | Intention to treat                                 |
| IWRS   | Interactive web response system                    |
| K      | Potassium                                          |
| LMWH   | Low molecular weight heparin                       |
| MCA    | Middle Cerebral Artery                             |
| MRI    | Magnetic Resonance Imaging                         |
| mRS    | modified Rankin Scale                              |
| Na     | Sodium                                             |
| NIHSS  | National Institute of Health Stroke Scale          |
| NSAID  | Non-Steroidal Anti-Inflammatory Drugs              |
| P-gp   | P-glycoprotein                                     |
| PP     | Per protocol                                       |
| PT     | Prothrombin time                                   |
| SBP    | Systolic blood pressure                            |
| SWI    | Susceptibility Weighted Imaging                    |
| TPA    | Tissue Plasminogen Activator                       |
| GLM    | General Linear Model                               |
| GLMM   | General Linear Mixed Model                         |

38

39

40 **Study Flow Chart**

| Activities                                   | Screening<br>(from Day -5) | Baseline<br>(Day 1) | Day 5 ± 2 | Week2<br>(Day 14 ± 5) | Week 4<br>(Day 30 ± 5) | Week 5<br>(Week 4 Visit + 7±1<br>days) | Post study<br>visit <sup>1</sup> | Unscheduled<br>visit <sup>2</sup> |
|----------------------------------------------|----------------------------|---------------------|-----------|-----------------------|------------------------|----------------------------------------|----------------------------------|-----------------------------------|
| Informed consent                             | ●                          |                     |           |                       |                        |                                        |                                  |                                   |
| Basic demographics                           | ●                          |                     |           |                       |                        |                                        |                                  |                                   |
| Inclusion/exclusion criteria                 | ●                          | ●                   |           |                       |                        |                                        |                                  |                                   |
| Medical history                              | ●                          |                     |           |                       |                        |                                        |                                  |                                   |
| Vital signs                                  | ●                          |                     |           |                       | ●                      |                                        |                                  | ●                                 |
| Laboratory test <sup>3</sup>                 | ●                          |                     | ●         | ● <sup>4</sup>        | ●                      | ● <sup>5</sup>                         |                                  | ●                                 |
| Pregnancy Test <sup>6</sup>                  | ●                          |                     |           |                       |                        |                                        |                                  |                                   |
| Electrocardiogram                            | ●                          |                     |           |                       |                        |                                        |                                  |                                   |
| Brain imaging <sup>7</sup>                   | ●                          |                     |           |                       | ●                      |                                        |                                  | ●                                 |
| mRS                                          | ●                          |                     |           |                       | ●                      |                                        |                                  | ●                                 |
| NIHSS                                        | ●                          |                     |           |                       | ●                      |                                        |                                  | ●                                 |
| HAS-BLED, CHADS2-<br>VASC                    |                            | ●                   |           |                       |                        |                                        |                                  |                                   |
| Randomization <sup>8</sup>                   |                            | ●                   |           |                       |                        |                                        |                                  |                                   |
| Administration of study<br>drug <sup>9</sup> |                            |                     |           |                       |                        | →                                      |                                  |                                   |
| Medication compliance                        |                            | ●                   | ●         | ● <sup>4</sup>        | ●                      |                                        |                                  |                                   |
| Adverse event                                |                            |                     |           |                       |                        |                                        | →                                | ●                                 |
| Concomitant medications                      | ●                          |                     |           |                       |                        | →                                      |                                  | ●                                 |

<sup>1</sup> It can be replaced by phone contact monitoring (44 ± 5 days).

<sup>2</sup> The test is conducted for the items required at the investigator's discretion.

<sup>3</sup> Screening and Week 4: all items of CBC, AST, ALT, BUN, Cr, PT, APTT, Na, K, Total cholesterol, and hs-CRP. For screening visit, measurements in the E.R. before obtaining the consent can be used instead; At Day 5 PT, BUN, and Cr will be measured (applicable to all in the warfarin group; For the rivaroxaban group, the serum Cr. test can be skipped in patients with CrCl ≥ 45ml/min measured at screening), Week 2: only applicable to the warfarin group; PT, BUN, Cr, Week 5: only applicable to the rivaroxaban; PT, BUN, Cr

<sup>4</sup> Only applicable to the warfarin group

<sup>5</sup> Applicable to certain patients in the warfarin group (Week 5 Visit is scheduled 7±1 days after Week 4)

<sup>6</sup> For women of childbearing potential, HCG urine test

<sup>7</sup> At screening, any test result measured in the E.R. before the consent is obtained can be used instead. At Week 4, it will be measured.

<sup>8</sup> Randomization is possible at screening on the assumption that all scheduled tests have been carried out (However, the study will be conducted with the first dose day of the investigational product considered as Day 1).

<sup>9</sup> In the rivaroxaban group, concomitant use of warfarin and rivaroxaban will continue for 5 days after switch to warfarin.

41 Table of Contents

42 SIGNATURE PAGE..... 2  
43 CLINICAL STUDY PROTOCOL SYNOPSIS..... 3  
44 TERMS AND ABBREVIATIONS.....10  
45 STUDY FLOW CHART .....11  
46 1 STUDY TITLE AND PHASE .....14  
47 2 STUDY CENTER AND PRINCIPAL INVESTIGATOR .....14  
48 3 STUDY OBJECTIVE AND BACKGROUND .....14  
49 3.1 Study Objective .....14  
50 3.2 Study Background .....15  
51 4 TRIAL DESIGN AND RATIONALE .....16  
52 5 PLANNED STUDY DURATION .....19  
53 6 TARGET DISEASE.....19  
54 7 INCLUSION/EXCLUSION CRITERIA.....19  
55 7.1 Inclusion Criteria .....19  
56 7.2 Exclusion Criteria.....19  
57 8 DETAILS AND METHODS OF CLINICAL STUDY.....20  
58 8.1 Selection of Control Group for Comparison .....20  
59 8.2 Randomization and Blinding.....20  
60 8.3 Study Assessment, Observation Timepoint and Method .....21  
61 8.3.1 Study Assessment, Observation Timepoint and Method .....21  
62 8.3.2 Assessment Measures and Recording Methods.....25  
63 9 INVESTIGATIONAL PRODUCTS .....26  
64 9.1 Investigational Product Management and Recording.....26  
65 9.2 Adverse Events.....26  
66 9.2.1 Rivaroxaban.....26  
67 9.2.2 Warfarin .....27  
68 9.2.3 Aspirin .....28  
69 9.3 Concomitant medications .....28  
70 9.4 Prohibited Concomitant Medications or Medications Requiring Caution .....29  
71 10 SAFETY ASSESSMENT .....29  
72 10.1 Definition of Adverse Event.....29  
73 10.2 Adverse Event Reporting Period.....29  
74 10.3 Serious Adverse Event (SAE) .....29  
75 10.4 Adverse Event Reporting Procedure .....29  
76 10.5 Assessment of Adverse Event Severity .....29  
77 10.6 Assessment of Causal Relationship.....30  
78 11 STATISTICAL ANALYSIS .....31  
79 11.1 Sample Size .....31  
80 11.2 Rationale for Sample Size .....31  
81 11.3 General Principles of Statistical Analysis Method .....32  
82 11.4 Efficacy and Safety Endpoint Analysis Methods .....32  
83 12 MEASUREMENT OF INVESTIGATIONAL PRODUCT COMPLIANCE .....33  
84 13 PREMATURE TERMINATION AND WITHDRAWAL CRITERIA.....33

|    |      |                                                                  |    |
|----|------|------------------------------------------------------------------|----|
| 85 | 14   | EFFICACY ANALYSIS .....                                          | 34 |
| 86 | 15   | MEASURES TO ENSURE SUBJECT SAFETY.....                           | 34 |
| 87 | 16   | SUBJECT INFORMED CONSENT FORM, COMPENSATION AND SUBJECT CARE AND |    |
| 88 |      | TREATMENT AFTER END OF STUDY .....                               | 34 |
| 89 | 16.1 | Subject Information and Informed Consent Form.....               | 34 |
| 90 | 16.2 | Agreement on Compensation .....                                  | 34 |
| 91 | 16.3 | Subject Care and Treatment After Completion of the Study .....   | 34 |
| 92 | 17   | CONSIDERATIONS FOR SAFE AND SCIENTIFIC CONDUCT OF THE STUDY..... | 34 |
| 93 | 17.1 | Compliance with Protocol and Protocol Amendment .....            | 34 |
| 94 | 17.2 | Study Monitoring .....                                           | 35 |
| 95 | 17.3 | Retention of Clinical Study-related Documents and Data.....      | 35 |
| 96 | 17.4 | Confidentiality of Clinical Study Data and Subject Records ..... | 35 |
| 97 | 18   | REFERENCES .....                                                 | 36 |
| 98 |      |                                                                  |    |
| 99 |      |                                                                  |    |

100 **1 Study Title and Phase**

101 Local, Multicenter, Phase II, Exploratory Clinical Study to Assess the Effects of Xarelto (Rivaroxaban)  
102 Versus Warfarin on Ischemia, Bleeding, and hospital stay in Acute Cerebral Infarction Patients with  
103 Nonvalvular Atrial Fibrillation

104 **2 Study Center and Principal Investigator**

---

**Name and Address of Study Center**

|                                                                                                                |                                  |
|----------------------------------------------------------------------------------------------------------------|----------------------------------|
| Asan Medical Center,<br>88, Olympic-ro 43-gil, Songpa-gu, Seoul, South Korea, 138-736                          | Sun-Uck Kwon, Neurology,<br>MD   |
| Inje University Ilsan Paik Hospital<br>170, Juhwa-ro, Ilsanseo-gu, Goyang-si, Gyeonggi-do, Korea               | Keun-Sik Hong, Neurology,<br>MD  |
| Chonnam National University Hospital<br>42, Jebong-ro, Dong-gu, Gwangju, Korea                                 | Man Seok, Park, Neurology,<br>MD |
| Ewha Womans University Mokdong Hospital<br>1071, Anyangcheon-ro, Yangcheon-gu, Seoul, Korea                    | Tae-Jin Song, Neurology,<br>MD   |
| Samsung Medical Center<br>50, Irwon-dong, Gangnam-gu, Seoul, Korea 135-710                                     | Oh-Young Bang, Neurology,<br>MD  |
| Kyungpook National University Hospital<br>130, Dongdeok-ro, Jung-gu, Daegu, Korea                              | Yong-Won, Kim,<br>Neurology, MD  |
| Dong-A University Hospital<br>26, Daesingongwon-ro, Seo-gu, Busan, Korea                                       | Jae-Kwan Cha, Neurology,<br>MD   |
| Korea University Guro hospital<br>148, Gurodong-ro, Guro-gu, Seoul, Korea                                      | Woo-Keun Seo, Neurology,<br>MD   |
| Inje University Busan Paik Hospital<br>75, Bokji-ro, Busanjin-gu, Busan, Korea                                 | Eung-Gyu Kim, Neurology,<br>MD   |
| Seoul National University Hospital<br>101, Daehak-ro, Jongno-gu, Seoul, Korea                                  | Byung-Woo Yoon,<br>Neurology, MD |
| Severance Hospital<br>50, Yonsei-ro, Seodaemun-gu, Seoul, Korea                                                | Hyo-Suk Nam, Neurology,<br>MD    |
| Hallym University Medical Center<br>22, Gwanpyeong-ro 170beon-gil, Dongan-gu, Anyang-si, Gyeonggi-do,<br>Korea | Kyung-Ho Yu, Neurology,<br>MD    |
| Pusan National University Hospital<br>179, Gudeok-ro, Seo-gu, Busan, Korea                                     | Sung Sang Min, Neurology,<br>MD  |
| Chosun University Hospital<br>365, Pilmun-daero, Dong-gu, Gwangju, Korea                                       | Sung-Hwan Ahn,<br>Neurology, MD  |

---

105 **3 Study Objective and Background**

106 **3.1 Study Objective**

107 To assess the effects of warfarin or Xarelto (rivaroxaban) after four-week treatment ( $30 \pm 5$  days) in acute  
108 cerebral infarction or transient ischemic attack with nonvalvular atrial fibrillation based on the independent  
109 investigator's brain image interpretation.

110

111 **Primary endpoint:**

- 112 1. To compare the incidence of intracranial bleeding or recurrent ischemic lesions confirmed by the brain  
113 imaging (FLAIR/GRE, or SWI, or if necessary, DWI) after four-week ( $30 \pm 5$  days) treatment with  
114 Xarelto or warfarin between the two groups

- 115 \* Intracranial bleeding: symptomatic haemorrhage confirmed by CT or MRI or asymptomatic haemorrhage  
116 confirmed by GRE or SWI at Week 4 ( $30 \pm 5$  days)
- 117 \* Recurrent ischemic lesion: symptomatic cerebral infarction confirmed by the appropriate brain imaging or  
118 asymptomatic ischemic lesions confirmed by FLAIR at Week 4 ( $30 \pm 5$  days)

119

## 120 **Secondary endpoints:**

- 121 1. the incidence of intracranial bleeding confirmed by brain imaging after 4 weeks treatment
- 122 2. the incidence of recurrent ischemic lesion confirmed by brain imaging after 4 weeks treatment
- 123 3. the total number of days of neurology division stay after randomization
- 124 4. the incidence of major bleeding defined by the International Society on Thrombosis and Haemostasis  
125 (ISTH)
  - 126 - fatal bleeding: death due to bleeding within 30 days
  - 127 - Symptomatic haemorrhage which occurs in a critical area (intracranial, intraspinal, intraocular,  
128 pericardial, intra-articular, or intramuscular with compartment syndrome, retroperitoneal).
  - 129 - Overt bleeding causing a fall in haemoglobin level of 2 g/dL or more, or leading to transfusion of  
130 two or more units of red blood cell or whole blood
- 131 5. the incidence of acute artery syndrome (myocardial infarction or unstable angina)
- 132 6. the incidence of major vascular events: stroke, myocardial infarction, or vascular death (including  
133 bleeding and ischemic vascular events)
- 134 7. the incidence of major vascular events and major bleeding (defined by the ISTH)
- 135 8. the incidence of clinical ischemic events: recurrent cerebral infarction, myocardial infarction, other  
136 ischemic events requiring vascular intervention and ischemic vascular death
- 137 9. the difference between the two groups in a score of the mRS (modified Rankin scale) after 4 weeks  
138 treatment ( $30 \pm 5$  days)

## 139 **3.2 Study Background**

140 Atrial fibrillation is one of the major causes of cerebral infarction<sup>1</sup>, and about 20 % of patients with cerebral  
141 infarction have atrial fibrillation in Korea.<sup>2</sup> Atrial fibrillation tends to increase in proportion to the age, and  
142 patients with cerebral infarction associated with atrial fibrillation are consistently on the rise worldwide.<sup>3</sup>  
143 Patients with cerebral infarction associated with atrial fibrillation have a high risk of recurrent stroke,  
144 requiring aggressive treatment strategies to prevent cerebral infarction. Many clinical trials have  
145 demonstrated that aspirin reduced the risk of stroke by 20%, and some have reported oral anticoagulants  
146 decreased the risk of recurrent stroke by over 66%. As patients especially with cerebral infarction have  
147 higher risk of recurrent stroke associated with atrial fibrillation, it is recommended to use warfarin in patients  
148 with cerebral infarction associated with atrial fibrillation.<sup>4-6</sup>

149 Risk of recurrent cerebral infarction is higher within the first month of cerebral infarction associated with  
150 atrial fibrillation.<sup>7</sup> Therefore, it is desirable to carry out anticoagulant therapy in patients with acute cerebral  
151 infarction. However, warfarin, a widely-used oral anticoagulant, causes the transient hypercoagulable state in  
152 the early phase of treatment, increasing the risk of ischemic events including embolism; it takes 4 to 5 days  
153 to have an adequate anticoagulant effect. In order to reduce such risk, the studies dosing heparin or low  
154 molecular weight-heparin in patients with acute cerebral infarction were carried out.<sup>8,9</sup> However, they didn't  
155 show the improvement in prognosis compared than the non-treatment group due to major bleeding events  
156 such as an increase in haemorrhagic transformation due to reopened blood vessel in infarcted tissues or  
157 intracranial haemorrhage. Based on these clinical study results, the guidelines on stroke treatment in most  
158 countries including Korea and the US cannot recommend an anticoagulant therapy in acute stroke  
159 patients.<sup>10,11</sup>

160 The current treatment guideline for acute cerebral infarction patients with atrial fibrillation is to dose aspirin  
161 and warfarin concomitantly after dosing aspirin alone for a certain period<sup>12</sup> and discontinue aspirin to use

162 warfarin alone at the first time when INR value, which can indicate an anticoagulant effect by warfarin,  
163 exceeds 1.7. However, there is no proper recommendation about an appropriate time to dose warfarin.

164 Dosing of aspirin and warfarin in acute cerebral infarction patients with atrial fibrillation in accordance with  
165 the current treatment guideline may cause the increased risk of ischemia due to transient hypercoagulable  
166 state that may occur in the initial phase of treatment with warfarin<sup>16</sup> and increased risk of bleeding associated  
167 with excessive anticoagulation, and unavoidably frequent blood tests and prolonged hospitalization due to  
168 unknown time of anticoagulant effect by warfarin. It may also increase the risk of bleeding associated with  
169 aspirin concomitantly used in the initial phase of treatment.

170 Rivaroxaban is a newly developed factor Xa inhibitor, a new oral anticoagulant. A recent large-scale clinical  
171 trial in patients at high risk of stroke and atrial fibrillation showed that rivaroxaban reduced cardiovascular  
172 events significantly including stroke compared to warfarin.<sup>13</sup> The drug is commonly used to prevent stroke in  
173 patients at high risk of stroke with atrial fibrillation because it is more convenient to take than warfarin, and  
174 decreased significantly the incidence of intracranial bleeding in the clinical trial in these high-risk patients.<sup>13,</sup>  
175 <sup>14</sup>

176 Considering these excellent results from clinical trials as well as the rapid onset of action and consistent  
177 effects, rivaroxaban is expected to be a good alternative in patients with acute cerebral infarction.

178 Rivaroxaban, unlike warfarin, does not lead to a transient hypercoagulable state in the initial phase of  
179 treatment and may reduce the risk of ischemic events. Rivaroxaban does not cause excessive anticoagulation  
180 which may occur in the initial phase of treatment with warfarin, and can reduce the incidence of bleeding  
181 caused by aspirin and shorten hospital stay.

182 The clinical study Triple AXEL will evaluate the incidence of ischemia and bleeding as adverse events, and  
183 hospital stay by rivaroxaban, a new oral anticoagulant compared to the conventional treatment and assess if  
184 rivaroxaban can be a new treatment guide in patients with acute cerebral infarction associated with atrial  
185 fibrillation.

## 186 4 Trial Design and Rationale

187 Randomized, active comparator, open-label clinical trial

---

### Rivaroxaban group

Rivaroxaban 10 mg will be dosed orally once daily from the randomization to Day 5 ± 2. In patients with the estimated CrCl ≥ 45 ml/min at screening, rivaroxaban 15 mg or 20 mg depending on the estimated CrCl at screening will be dosed from Day 6 ± 2 without a special renal function test. In patients with the estimated CrCl < 45 ml/min at screening, rivaroxaban 15 mg or 20 mg once daily depending on the renal function measured at Day 5 ± 2 will be dosed from Day 6 ± 2 to Week 4 (Day 30 ± 5). At Week 4 Visit, patients will have the tests including brain imaging, and can switch to the conventional treatment containing warfarin at the physician's discretion. For safe switch from rivaroxaban to warfarin, rivaroxaban is dosed concomitantly with warfarin for 5 days; after the concomitant use of rivaroxaban and warfarin is continued until the patients receive the safety tests including INR at the OPD after 7 ± 1 days of the last visit (Week 4) or INR becomes ≥ 2.0, it can be switched to warfarin alone. In the latter case, Week 5 Visit can be exempted. In case of continuous use of rivaroxaban after the study period, Week 5 Visit will not be carried out. At post-study visit (Day 44 ± 5), visit or phone monitoring will be carried out to check adverse events.

### Warfarin group

After randomization, warfarin plus aspirin will be dosed concomitantly (for the subjects who are taking warfarin at randomization and has baseline INR >1.7, warfarin alone will be taken without aspirin). At Day 5 ± 2 days, INR will be checked; when INR > 1.7 is reached, aspirin will be stopped and warfarin alone will be taken. INR will be measured at Week 2 to verify whether the warfarin dose is well maintained, and, if necessary, the dose will be adjusted with a target at INR 2-3. The last dose of the investigational drug will be taken Week 4 (Day 30 ± 5), and the tests including brain imaging will be carried out at the OPD after the last dose of warfarin. Afterwards, warfarin, a



conventional treatment, will be maintained. At post-study visit (Day  $44 \pm 5$ ), visit or phone monitoring will be carried out to check adverse events.

188

189 The conventional treatment guideline for acute cerebral infarction patients with atrial fibrillation is to dose  
190 aspirin plus warfarin concomitantly<sup>12</sup> and to stop aspirin and begin warfarin alone when INR, which assesses  
191 the anticoagulant effect of warfarin, starts to exceed 1.7.

192 The control group is designed to begin with aspirin plus warfarin at randomization, and, when INR  $>1.7$   
193 reached, warfarin QD alone with a target at INR 2-3 (in case that patients who have been given warfarin  
194 before participating in the study and their baseline INR exceeds 1.7, warfarin alone, not in combination with  
195 aspirin, may be dosed with a target at INR 2-3).

196 Rivaroxaban, a factor Xa inhibitor, reduced significantly the incidence of cardiovascular events including  
197 stroke compared to warfarin in a large-scale clinical trial involving patients at high risk of stroke with atrial  
198 fibrillation.<sup>13</sup> This clinical trial is designed to dose rivaroxaban 10 mg for the first  $5 \pm 2$  days after  
199 randomization, and then rivaroxaban 15 mg or 20 mg depending on the renal function.

**Screening period**

**Treatment period**

**Observation period**

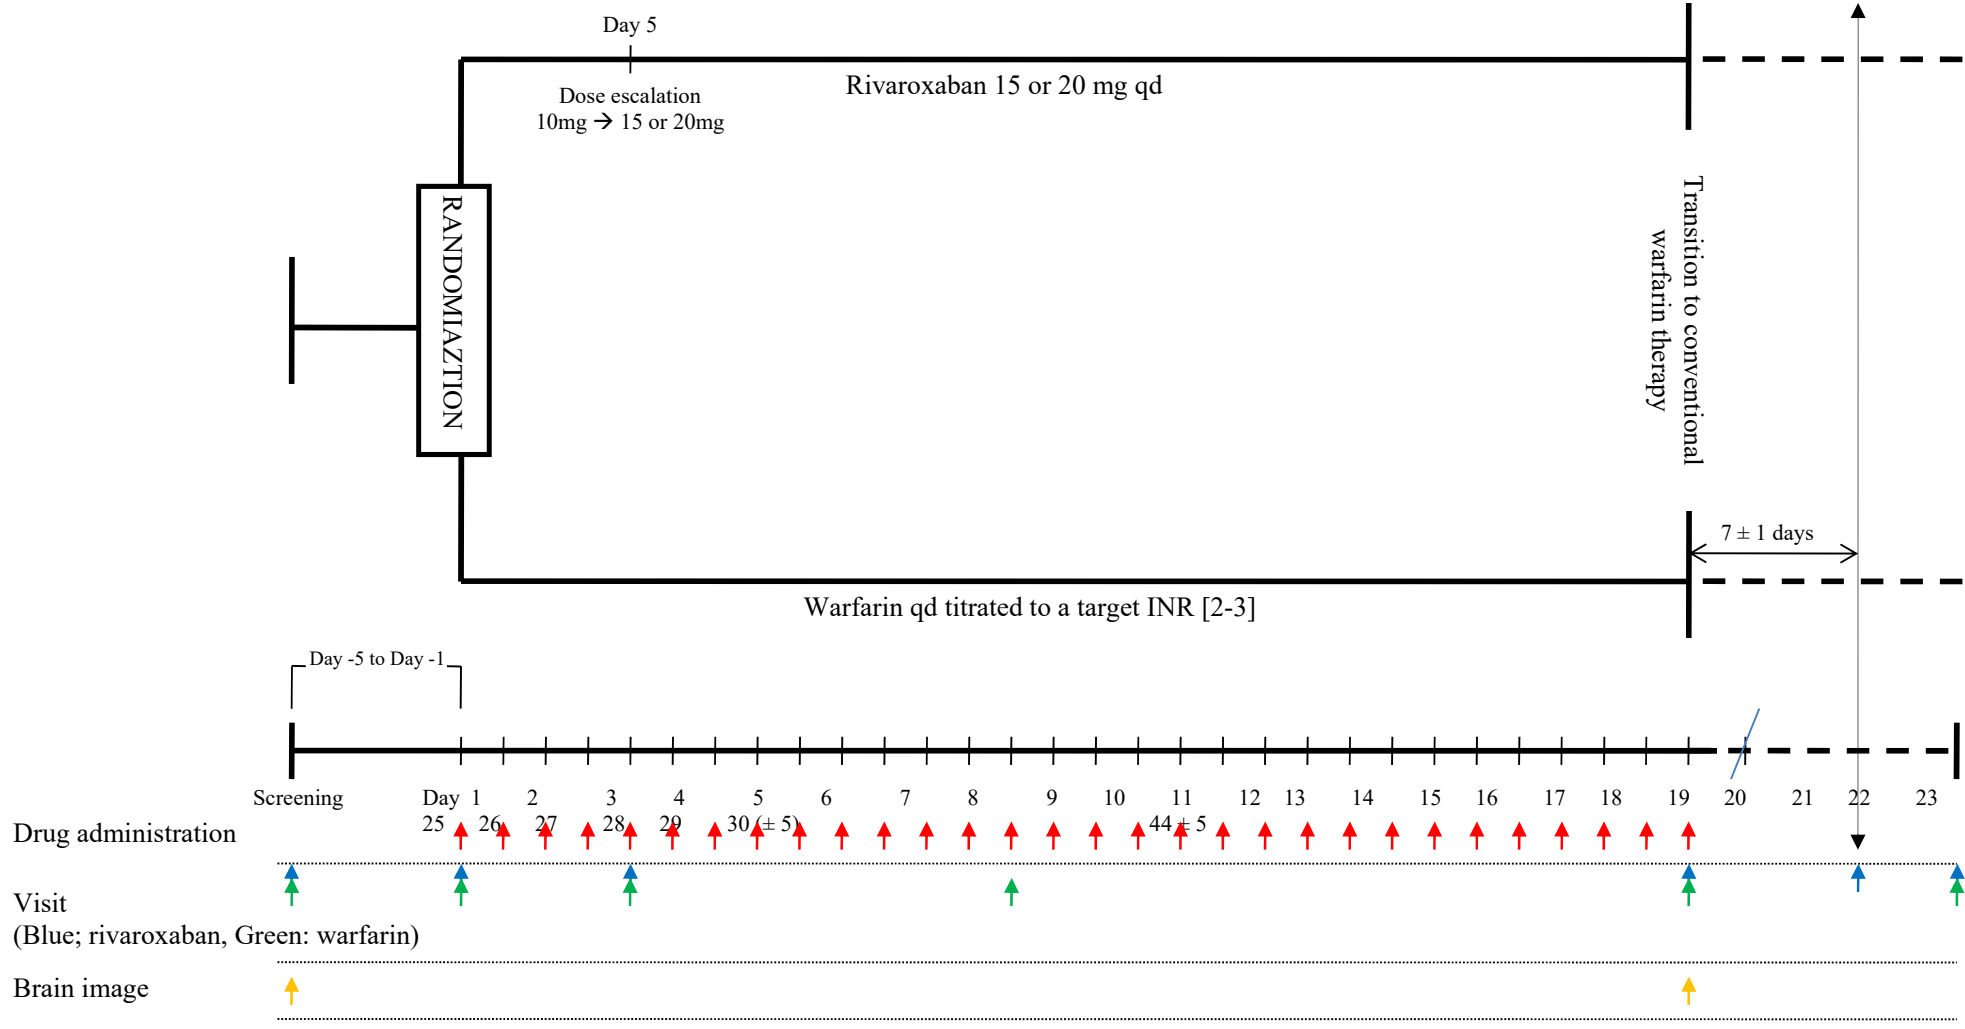

200

## 201 **5 Planned Study Duration**

202 36 months from IRB approval date

203 : The period of treatment with the investigational product is from randomization to Week 4 ( $30 \pm 5$ ). For  
204 treatment thereafter, switch to the conventional standard treatment will be performed at the physician's  
205 discretion. However, the safety information will be collected until  $44 \pm 5$  days during the post-study visit,  
206 and reported to the regulatory authorities in compliance with the relevant regulations.

## 207 **6 Target Disease**

208 Acute cerebral infarction or transient ischemic attack associated with non-valvular atrial fibrillation.

## 209 **7 Inclusion/exclusion Criteria**

### 210 **7.1 Inclusion Criteria**

- 211 1. Patients with acute ischemic stroke or transient ischemic attack presumed to be cardioembolic origin  
212 within 5 days from stroke onset (with mild severity: infarct size on DWI less than 1/3 of MCA territory,  
213 1/2 of ACA territory, 1/2 of PCA territory, and 1/2 of one cerebellar hemisphere)
- 214 2. Patients with atrial fibrillation including paroxysmal atrial fibrillation: atrial fibrillation must be  
215 documented by ECG evidence within 30 days before randomization. This could be obtained from a  
216 notation in the subject's record (e.g., medical chart, hospital discharge summary).
- 217 3. Male or Female aged  $\geq 19$  years
- 218 4. Patients who voluntarily give their prior consent to participate in the study

### 219 **7.2 Exclusion Criteria**

- 220 1. Patients with chronic renal failure ( $\text{CrCl} < 30$  ml/min) or severe hepatic impairment
- 221 2. Patients with significant haemorrhagic transformation: parenchymal hematoma type I or II by the  
222 ECASS definition
- 223 3. Patients with stroke presumed due to small vessel occlusion: single subcortical infarct in the perforating  
224 artery territory
- 225 4. Patients with large hemispheric or cerebellar infarction (larger than 1/3 of MCA territory, 1/2 of ACA  
226 territory, 1/2 of PCA territory, and 1/2 of one cerebellar hemisphere)
- 227 5. Patients who requires warfarin therapy due to replacement by prosthetic valve
- 228 5. Patients with active internal bleeding
- 229 6. Patients considered to have increased risk of bleeding due to a recent history of intracranial or  
230 intracerebral bleeding
- 231 7. Major surgery or major trauma within 30 days before screening that might be associated with increased  
232 bleeding risk
- 233 8. Clinically significant gastrointestinal bleeding within 6 months before screening
- 234 9. Intravenous tissue plasminogen activator(TPA) dosing or mechanical embolectomy within 48 hours  
235 before screening and 'significant haemorrhagic transformation as described above (exclusion criteria 2)'  
236 or 'cerebral hemisphere infarction or cerebellar infarction as described above (exclusion criteria 4)':  
237 patients achieving successful reperfusion without haemorrhage nor large infarction are eligible for  
238 enrollment
- 239 10. Severe anaemia: hemoglobin  $< 10$  g/dL
- 240 11. Bleeding diathesis; thrombocytopenia ( $< 90,000/\mu\text{L}$ , prolonged PT ( $\text{INR} > 1.7$ ))

- 241 12. Sustained uncontrolled hypertension: SBP >180 mmHg or DBP >100 mmHg
- 242 13. Severe devastating illness, such as end-stage cancer, hepatic failure; therefore, patients with a life  
243 expectancy less than 6 months.
- 244 14. Patients with planned invasive procedure with potential for uncontrolled bleeding, including major  
245 surgery
- 246 15. The longer period out of 1 month before screening or 5 times of the half-lives of an active ingredients of  
247 CYP3A4 inhibitor or P-gp inhibitors, has not passed since the last administration of CYP3A4 and P-gp  
248 inhibitors that may increase significantly the pharmacodynamic effect of rivaroxaban or patients who  
249 are scheduled to take those medicines during this study: azole antifungal agents including ketoconazole,  
250 itraconazole, voriconazole, and posaconazole and HIV protease inhibitors including ritonavir.
- 251 16. The longer period out of 1 month before screening or 5 times of the half-lives of an active ingredients of  
252 CYP3A4 inducer or P-gp inducer has not passed since the last administration of CYP3A4 and P-gp  
253 inducers that may significantly decrease the pharmacodynamics effect of rivaroxaban or patients who  
254 are scheduled to take those medicines during this study: rifampicin /rifampin, phenytoin, phenobarbital,  
255 carbamazepine, and Saint. John's wort
- 256 17. Expected long-term use of NSAIDs
- 257 18. Drug or alcohol abuse
- 258 19. Patients in whom MRI is prohibited
- 259 20. Pregnant or lactating women
- 260 21. Patients who are allergic or hypersensitive to the investigational drugs (rivaroxaban, warfarin, and  
261 aspirin) or in whom the drugs are contradicted
- 262 22. Patients who cannot or are not willing to carry out the procedures required in this study
- 263 23. Patients who are investigators that are related directly to this study or employees of the center
- 264 24. Patients who are not willing to use contraception methods during this study
- 265 25. Patients who participated in another clinical study within 3 months before the first study drug dose or  
266 are participating in another clinical study (excluding observational studies; the end of a previous clinical  
267 study is defined as the last dosing date of the investigational product on previous study)
- 268 26. Patients considered ineligible for the study by the investigator due to other reasons including the results  
269 of laboratory test

## 270 8 Details and Methods of Clinical Study

### 271 8.1 Selection of Control Group for Comparison

| Control group                                                                                                                              | Study group                                                                                                                                                                        |
|--------------------------------------------------------------------------------------------------------------------------------------------|------------------------------------------------------------------------------------------------------------------------------------------------------------------------------------|
| Daewha warfarin Tablet (2, 5 mg)                                                                                                           | Bayer Xarelto tablet (10, 15, 20 mg)                                                                                                                                               |
| *concomitant dosing with aspirin until the first results of INR > 1.7                                                                      |                                                                                                                                                                                    |
| Subcutaneous low dose heparin or LMWH can be concomitantly used when INR is ≤ 1.7 at the study doctor's discretion in order to prevent DVT | Subcutaneous low dose heparin or LMWH can be used at the study doctor's discretion in order to prevent DVT, but it should be discontinued 24 hours before the dose of rivaroxaban. |

272

### 273 8.2 Randomization and Blinding

274 All subjects who meet the inclusion criteria and do not fall under the exclusion criteria will be randomized to  
275 either the study group (rivaroxaban) or control group (warfarin) in a 1:1 ratio.

276 Randomization method: The randomization table is prepared and linked to an e-CRF. The subjects assessed  
277 eligible at the screening test are block-randomized to one of two treatment groups in order of enrolment  
278 using the interactive web response system (IWRS). This is an open-label study where both the investigators  
279 and patients are aware of assigned treatment.

| <b>Treatment group</b> | <b>No. of subjects</b> | <b>Dosage and administration</b>                                                                                                                                                                                      | <b>Route of administration</b> |
|------------------------|------------------------|-----------------------------------------------------------------------------------------------------------------------------------------------------------------------------------------------------------------------|--------------------------------|
| <b>Control group</b>   | 98                     | Concomitant administration of aspirin 100 mg once daily and warfarin once daily<br>3) INR > 1.7<br>Warfarin once daily with a target at INR 2-3                                                                       | per oral                       |
| <b>Study group</b>     | 98                     | Rivaroxaban 10 mg once daily for 5 ± 2 days<br>Day 6 ± 2<br>: Rivaroxaban 15 mg or 20 mg once daily depending on the patient's CrCl<br>- CrCl 30-49 m/min: 15 mg, once a day<br>- CrCl ≥ 50 ml/min: 20 mg, once a day | per oral                       |

280

### 281 **8.3 Study Assessment, Observation Timepoint and Method**

#### 282 **8.3.1 Study Assessment, Observation Timepoint and Method**

##### 283 **1. Screening (- 5 day to -1 day)**

- 284 ✓ Explanation of Subject Information Sheet and Collection of voluntarily signed consent form
- 285 ✓ Review and verification of the inclusion and exclusion criteria
- 286 ✓ Subject basic information (demographic information: date of birth, age, gender, height and weight) and  
287 medical history
- 288 ✓ Vital sign measurement (systolic/diastolic blood pressure and pulse)
- 289 ✓ Laboratory tests (all items of CBC, AST/ALT, BUN, Cr, PT, APTT, Na, K, Total cholesterol, and hs-  
290 CRP; Any result of tests conducted at E.R. before subject consent obtainment can be used instead of  
291 new testing.)
- 292 ✓ Urine HCG for women of childbearing potential
- 293 ✓ 12 lead ECG (Any result of ECG conducted at E.R. before subject consent obtainment can be used  
294 instead.)
- 295 ✓ Brain imaging (FLAIR/GRE or SWI/DWI)  
296 (Any result of CT and/or MRI carried out at E.R. before subject consent obtainment can be used  
297 instead.)
- 298 ✓ Investigations on concomitant medications
- 299 ✓ mRS and NIHSS assessment

##### 300 **2. Baseline (Day 1; the first dosing date of investigational product)**

- 301 ✓ Review and verification of the inclusion and exclusion criteria

- 302 ✓ Randomization to the control group or treatment group
- 303 ✓ Administration of the investigational product
- 304 ✓ Adverse event monitoring
- 305 ✓ Investigations on concomitant medication
- 306 ✓ Drug compliance
- 307 ✓ HAS-BLED and CHADS2-VASC
- 308 **3. Day 5 (Day 5 ± 2)**
- 309 ✓ Laboratory tests (PT, BUN, Cr)
- 310 \* Applicable to all warfarin groups; in case of the rivaroxaban group, the patients with CrCl  $\geq$  45ml/min at
- 311 screening can skip the serum Cr test (the dose of rivaroxaban will be decided based on the result of CrCl at
- 312 screening).
- 313 ✓ In the rivaroxaban group, the dose will be adjusted based on CrCl before administration. In the warfarin
- 314 group, aspirin will be discontinued based on INR result. If required, the dose of warfarin is adjusted
- 315 before administration.
- 316 ✓ Drug compliance
- 317 ✓ Adverse event monitoring
- 318 ✓ Investigations on concomitant medication
- 319 **4. Only for warfarin group; Day 14 ± 5 (Week 2)**
- 320 ✓ Laboratory tests (PT, BUN, Cr)
- 321 ✓ Checking the adequate warfarin dose, and, if necessary, dose adjustment before administration
- 322 ✓ Drug compliance
- 323 ✓ Adverse event monitoring
- 324 ✓ Investigations on concomitant medication
- 325 **5. Day 30 ± 5 (Week 4)**
- 326 ✓ Vital sign measurement (systolic/diastolic blood pressure and pulse)
- 327 ✓ Laboratory tests (all items of CBC, AST/ALT, BUN, Cr, PT, APTT, Na, K, Total cholesterol, and hs-
- 328 CRP)
- 329 ✓ Brain imaging (FLAIR/GRE or SWI or, if necessary, DWI)
- 330 ✓ NIHSS and mRS assessment
- 331 ✓ Drug compliance
- 332 ✓ Adverse event monitoring
- 333 ✓ Investigations on concomitant medication
- 334 ✓ Last dosing of the investigational product. Afterwards, the treatment will be switched to the currently
- 335 common treatment or maintained at the physician's discretion (For safe switch from rivaroxaban to
- 336 warfarin, the quantities for 5-day dosings of rivaroxaban will be dispensed so that rivaroxaban can be
- 337 concomitantly used with warfarin for 5 days. If a subject in rivaroxaban continues rivaroxaban at
- 338 physician's discretion or concomitant dosing of rivaroxaban and warfarin is used until INR $\geq$ 2.0 and
- 339 then switched to warfarin alone, Week 5 Visit can be skipped.)
- 340 ✓ Total number of days of neurology division stay from randomization will be checked and recorded.
- 341 **6. A part of patients in rivaroxaban group; 7± 1 days after Week 4 Visit (Week 5)**
- 342 ✓ Laboratory tests (PT, BUN, Cr)
- 343 ✓ Adverse event monitoring

344 ✓ concomitant medication monitoring

345 **7. Post study visit (Day 44 ± 5)**

346 ✓ Adverse event monitoring

347 **8. Unscheduled Visit**

348 If the subject visits the hospital relating to an adverse event apart from scheduled visits during the study,  
349 his/her status should be checked by the following tests and assessments at the investigator's discretion. The  
350 data related to all the adverse events occurring from randomization and the last visit (Day 44 ± 5) should be  
351 recorded in source documents and CRFs in an accurate and complete way. When subjects visits a study  
352 center for other purposes, tests and assessment will not be conducted.

353 ✓ Vital signs (systolic/diastolic blood pressure and pulse) measurement

354 ✓ Laboratory tests required at the investigator's discretion

355 ✓ Brain imaging (CT or MRI) at the investigator's discretion

356 ✓ NIHSS and mRS assessment at the investigator's discretion

357 ✓ Adverse event monitoring

358 ✓ Concomitant medications investigation

| Activities                                | Screening<br>(from Day -5) | Baseline<br>(Day 1) | Day 5 ± 2 | Week 2<br>(Day 14 ± 5) | Week 4<br>(Day 30 ± 5) | Week 5 (Week 4<br>Visit + 7±1<br>days) | Post study<br>visit <sup>1</sup> | Unschedu<br>led visit <sup>2</sup> |
|-------------------------------------------|----------------------------|---------------------|-----------|------------------------|------------------------|----------------------------------------|----------------------------------|------------------------------------|
| Informed consent                          | ●                          |                     |           |                        |                        |                                        |                                  |                                    |
| Basic demographics                        | ●                          |                     |           |                        |                        |                                        |                                  |                                    |
| Inclusion/exclusion criteria              | ●                          | ●                   |           |                        |                        |                                        |                                  |                                    |
| Medical history                           | ●                          |                     |           |                        |                        |                                        |                                  |                                    |
| Vital signs                               | ●                          |                     |           |                        | ●                      |                                        |                                  | ●                                  |
| Laboratory test <sup>3</sup>              | ●                          |                     | ●         | ● <sup>4</sup>         | ●                      | ● <sup>5</sup>                         |                                  | ●                                  |
| Pregnancy Test <sup>6</sup>               | ●                          |                     |           |                        |                        |                                        |                                  |                                    |
| Electrocardiogram                         | ●                          |                     |           |                        |                        |                                        |                                  |                                    |
| Brain imaging <sup>7</sup>                | ●                          |                     |           |                        | ●                      |                                        |                                  | ●                                  |
| mRS                                       | ●                          |                     |           |                        | ●                      |                                        |                                  | ●                                  |
| NIHSS                                     | ●                          |                     |           |                        | ●                      |                                        |                                  | ●                                  |
| HAS-BLED, CHADS2-VASC                     |                            | ●                   |           |                        |                        |                                        |                                  |                                    |
| Randomization <sup>8</sup>                |                            | ●                   |           |                        |                        |                                        |                                  |                                    |
| Administration of study drug <sup>9</sup> |                            |                     |           |                        |                        | →                                      |                                  |                                    |
| Medication compliance                     |                            | ●                   | ●         | ● <sup>4</sup>         | ●                      |                                        |                                  |                                    |
| Adverse event                             |                            |                     |           |                        |                        |                                        | →                                | ●                                  |
| Concomitant medications                   | ●                          |                     |           |                        | →                      | ● <sup>5</sup>                         |                                  | ●                                  |

359

<sup>1</sup> It can be replaced by phone contact monitoring (44 ± 5 days).

<sup>2</sup> The test is conducted for the items required at the investigator's discretion.

<sup>3</sup> Screening and Week 4: all items of CBC, AST, ALT, BUN, Cr, PT, APTT, Na, K, Total cholesterol, and hs-CRP. For screening visit, measurements in the E.R. before obtaining the consent can be used instead; At Day 5 PT, BUN, and Cr will be measured (applicable to all in the warfarin group; For the rivaroxaban group, the serum Cr. test can be skipped in patients with CrCl ≥ 45ml/min measured at screening), Week 2: only applicable to the warfarin group; PT, BUN, Cr, Week 5: only applicable to the rivaroxaban; PT, BUN, Cr

<sup>4</sup> Only applicable to the warfarin group.

<sup>5</sup> Applicable to certain patients in the warfarin group (Week 5 Visit is scheduled 7±1 days after Week 4)

<sup>6</sup> For women of childbearing potential, HCG urine test

<sup>7</sup> At screening, any test result measured in the E.R. before the consent is obtained can be used instead. At Week 4, it will be measured.

<sup>8</sup> Randomization is possible at screening on the assumption that all scheduled tests have been carried out (However, the study will be conducted with the first dose day of the investigational product considered as Day 1).

<sup>9</sup> In the rivaroxaban group, concomitant use of warfarin and rivaroxaban will continue for 5 days after switch to warfarin.



### 360 8.3.2 Assessment Measures and Recording Methods

#### 361 1. Brain imaging, mRS scores, NIHSS and laboratory tests

##### 362 - Brain imaging

363 Brain imaging such as CT or MRI can be taken in accordance with each center's standard operating  
364 procedure (SOP). Braining imaging including GRE or SWI/FLAIRE or, if required, DWI should be  
365 carried out. The brain imaging data will be collected in the designated central Internet-based system  
366 and interpreted by the independent imaging review committee (IIRC). The IIRC may request data  
367 supplementation and each center should do its best to reply to the supplementation request.

##### 368 - Modified Rankin Scale (mRS)

369 MRS (modified ranking scale) is a scale used to measure the degree of disability after onset of  
370 stroke. The scale runs from 0 to 6: 0 means no disability at all and a higher score indicates a severer  
371 disability. MRS to be used in this study is described in [Appendix 1].

##### 372 - National institute of health stroke scale (NIHSS)

373 NIHSS is a tool to assess severity of neurological deficits. A higher score means a higher severity.  
374 NIHSS to be used in this study is described in [Appendix 2].

#### 375 2. Laboratory tests

376 The laboratory tests will be carried out by the laboratory medicine division of each center, and the  
377 quality assurance certificate will be retained to guarantee reliability of the center's test results. The  
378 normal ranges of test results will be prepared, signed by the investigator and retained. They should be  
379 appropriately modified whenever the normal ranges of tests results are changed.

#### 380 3. Adverse events

381 - All adverse events occurring during the study should be recorded, if possible, using the MedDRA  
382 preferred terms (PT). If this is not feasible, the used terms of the symptoms and signs observed by  
383 the investigator or reported by the subject will be recorded. In the CRF, symptoms and signs,  
384 duration (start and end dates), and severity (mild, moderate, and severe) of the adverse event, causal  
385 relationship with the study drug, action taken regarding the adverse event, serious adverse event  
386 (yes/no) will be recorded.

#### 387 4. Subject demographic information and medical history

388 - The subject demographic information including date of birth, gender, and age will be checked, and  
389 his/her past and recent medical history and drug history will be verified through the inquiry. Also,  
390 the height (marked in three digits by rounding off to the nearest whole number, cm) and weight  
391 (rounded off to the nearest tenth, kg).

392 5. CrCl will be calculated with the Cockcroft Gault formula.

#### 393 6. Standardization tool for warfarin dose

394 The loading dose of warfarin will be determined by the formula below to standardise the warfarin dose.  
395 The dose thereafter will be determined at the investigator's medical discretion.

396 Initial dose =  $\exp [0.613 + (0.425 \times \text{BSA}) - (0.0075 \times \text{age}) + (0.156 \times 0; \text{Korean}) + (0.216 \times \text{target INR})$   
397  $- (0.257 \times \text{amiodarone}) + (0.108 \times \text{smokes}) + 0.0784 \times \text{DVT/PE}]$

398  $(\text{Weight}) \text{ kg}^{0.425} \times (\text{Height}) \text{ cm}^{0.725} \times 0.007184 = \text{BSA in M}^2$

399 For the rivaroxaban group, the maintenance dose will be basically used without the loading dose  
400 considering bleeding risk when rivaroxaban is switched to warfarin at Week 4

#### 401 7. Assessment Tools for Bleeding Risk

##### 402 - HAS BLED Score

403 The HAS BLED score is a tool to assess bleeding risk with hypertension, abnormal liver/renal  
404 function, stroke history, bleeding predisposition, labile INRs, elderly, and drugs/alcohol usage. For

405 more details of the HAS BLEED Score Calculator, a tool to be used in this study, see  
406 <http://www.globalrph.com/has-bleed-score.htm>.  
407 - CHADS2-VASC  
408 This tool assesses the risk of ischemic stroke in patients with atrial fibrillation using congestive  
409 heart failure, hypertension, age ( $\geq 75$ ), diabetes mellitus, stroke, vascular disease, age(65 -74), and  
410 sex category. For more details of CHADS2-VASC calculator, see  
411 <http://clincalc.com/Cardiology/Stroke/CHADSVASC.aspx>.

## 412 9 Investigational Products

413 Principal investigator and those who are entrusted with the duty by the principal investigator are responsible  
414 for investigational product management during this study.

### 415 9.1 Investigational Product Management and Recording

416 The investigational product managing pharmacist (“managing pharmacist”) or a person who has been  
417 entrusted with the duty by the principal investigator (“a person designated by the principal investigator”) will  
418 be responsible for managing and retrieving the drugs used in this study.

419 The study pharmacist or a person designated by the principal investigator should appropriately manage the  
420 investigational products according to the protocol and ensure that the investigational products are used in the  
421 subjects according to the protocol. The medical guidance will be provided for the subjects. When the subject  
422 visits the center, the investigational product purchase receipts and returned quantity for each randomized  
423 group will be collected and recorded. The returned investigational products should be stored in a safe cabinet  
424 or dedicated room that can be accessed only to the center staff. The unused investigational products will be  
425 stored until the sponsor makes a decision on the destruction or retrieval. If the study is completed, all unused  
426 drugs and a copy of the drug management record should be submitted to the monitor or destroyed according  
427 to the legal procedures.

### 428 9.2 Adverse Events

#### 429 9.2.1 Rivaroxaban

| System organ class                                          | Common                                                                                                                                                                                                  | Uncommon                                                       | Rare                          |
|-------------------------------------------------------------|---------------------------------------------------------------------------------------------------------------------------------------------------------------------------------------------------------|----------------------------------------------------------------|-------------------------------|
| <b>Blood and lymphatic system disorders</b>                 | Anaemia (incl. respective laboratory parameters)                                                                                                                                                        | Thrombocytopenia (incl. platelet count increased) <sup>A</sup> |                               |
| <b>Cardiac disorders</b>                                    |                                                                                                                                                                                                         | Tachycardia                                                    |                               |
| <b>Eye disorders</b>                                        | Eye haemorrhage (incl. conjunctival haemorrhage)                                                                                                                                                        |                                                                |                               |
| <b>Gastrointestinal disorders</b>                           | Gingival bleeding, gastrointestinal tract haemorrhage (incl. rectal haemorrhage), gastrointestinal and abdominal pains, dyspepsia, nausea, constipation <sup>A</sup> , diarrhoea, vomiting <sup>A</sup> | Dry mouth                                                      |                               |
| <b>General disorders and administration site conditions</b> | Fever <sup>A</sup> , peripheral oedema, decreased general strength and energy (incl. fatigue and asthenia)                                                                                              | Feeling unwell (incl. malaise)                                 | Localised oedema <sup>A</sup> |
| <b>Hepatobiliary disorders</b>                              |                                                                                                                                                                                                         | Hepatic function Abnormal                                      | Jaundice                      |
| <b>Immune system disorders</b>                              |                                                                                                                                                                                                         | Allergic reaction, dermatitis allergic                         |                               |

|                                                        |                                                                                                                                                                       |                                                                                                                                                                                                   |                                                                              |
|--------------------------------------------------------|-----------------------------------------------------------------------------------------------------------------------------------------------------------------------|---------------------------------------------------------------------------------------------------------------------------------------------------------------------------------------------------|------------------------------------------------------------------------------|
| <b>Injury, poisoning and procedural complications</b>  | Postprocedural haemorrhage (incl. postoperative anaemia, and wound haemorrhage), contusion                                                                            | wound secretion <sup>A</sup>                                                                                                                                                                      | Vascular pseudoaneurysm <sup>C</sup>                                         |
| <b>Investigations</b>                                  | Increase in transaminases                                                                                                                                             | Increased bilirubin, increased blood alkaline phosphatase <sup>A</sup> , increased LDH <sup>A</sup> , increased lipase <sup>A</sup> , increased amylase <sup>A</sup> , increased GGT <sup>A</sup> | Bilirubin conjugated increased (with or without concomitant increase of ALT) |
| <b>Musculoskeletal and connective tissue disorders</b> | Pain in extremity <sup>A</sup>                                                                                                                                        | Haemarthrosis                                                                                                                                                                                     | Muscle haemorrhage                                                           |
| <b>Nervous system disorders</b>                        | Dizziness, headache                                                                                                                                                   | Cerebral                                                                                                                                                                                          | Cerebral and intracranial haemorrhage, syncope                               |
| <b>Renal and urinary disorders</b>                     | Urogenital tract haemorrhage (incl. haematuria and menorrhagia <sup>B</sup> ), renal impairment (incl. blood creatinine increased, blood urea increased) <sup>A</sup> |                                                                                                                                                                                                   |                                                                              |
| <b>Respiratory, thoracic and mediastinal disorders</b> | Epistaxis, haemoptysis                                                                                                                                                |                                                                                                                                                                                                   |                                                                              |
| <b>Skin and subcutaneous tissue disorders</b>          | Pruritus (incl. uncommon cases of generalised pruritus), rash, ecchymosis, cutaneous and subcutaneous haemorrhage                                                     | Urticaria                                                                                                                                                                                         |                                                                              |
| <b>Vascular disorders</b>                              | Hypotension, haematoma                                                                                                                                                |                                                                                                                                                                                                   |                                                                              |

430 A: observed in prevention of venous thromboembolism (VTE) after major orthopedic surgery of the lower  
431 extremities

432 B: observed as very common in treatment of DVT and PE and decrease in recurrence risk in women < 55  
433 years

434 C: observed as uncommon in prevention of acute coronary syndrome in patients following percutaneous  
435 coronary intervention)

## 436 9.2.2 Warfarin

### 437 1) Hematology System

438 (1) fatal or nonfatal hemorrhage from any tissue or organ: Bleeding caused by an overdose, bleeding  
439 of gastrointestinal and genitourinary tracts due to latent lesions, paralytic ileus and visceral  
440 disorder caused by submucous and intramural bleeding, excessive uterine bleeding, and  
441 haemorrhagic necrosis of women's breasts and other sites (necrosis, angiitis, and bleeding from  
442 skin and intra-skin tissues due to thrombosis), or adrenal hemorrhage may occur.

443 (2) Haemorrhagic complications may present as paralysis; paresthesia; headache, chest pain,  
444 abdominal pain, joint pain, muscle pain or other pain; dizziness; shortness of breath, difficulty in  
445 breathing or swallowing; unexplained swelling; weakness; hypotension; or unexplained shock.

446 (3) Leukopenia may occur.

447 2) Whole body: Rarely hypersensitivity/allergic reactions, pain, oedema, asthenia, fever, headache, fatigue,  
448 lethargy and malaise may occur.

449 3) CNS & PNS: Rarely dizziness and cold intolerance including feeling cold and chills may occur.

- 450 4) Gastrointestinal: Rarely nausea, diarrhea, vomiting, abdominal pain including cramping, and bloating  
451 may occur.
- 452 5) Liver and biliary system: Rarely elevated liver enzymes, hepatitis, jaundice, and cholestatic hepatic  
453 injury may occur.
- 454 6) Skin and skin appendage: Necrosis of skin and other tissues, and rarely alopecia, rash, pruritus,  
455 urticarial, and dermatitis including bullous eruptions may occur.
- 456 7) Vascular: Rarely systemic cholesterol micro-embolization, purple toes syndrome, and vasculitis may  
457 occur.
- 458 8) Sensory: Paresthesia, and rarely taste perversion may occur.
- 459 9) Long-term use: events of tracheal or tracheobronchial calcification in association with long-term  
460 therapy may occur.
- 461 10) Miscellaneous: Priapism may occur.

### 462 9.2.3 Aspirin

463 The listed adverse drug reactions are based on post-marketing spontaneous reporting for all oral aspirin  
464 agents including long- and short-term use.

- 465 1) Shock: Shock and anaphylactic shock (dyspnea, generalised flush, angioedema, and urticaria) may  
466 occur. Patients should be closely monitored, and if there is any abnormality, the medicinal product  
467 should be discontinued and proper action should be taken. This medicinal product may induce asthma  
468 attacks.
- 469 2) Hypersensitivity: Hypersensitivities including erythema, pruritus, nasal obstruction, cardiorespiratory  
470 disorders, sometimes rash, oedema, urticaria, rhinitis-like symptoms, and conjunctivitis may occur. In  
471 this case, the medicinal product should be discontinued.
- 472 3) Skin: Rare Lyell Syndrome (toxic epidermal necrolysis), Stevens-Johnson syndrome (mucocutaneous  
473 ocular syndrome) and exfoliative dermatitis may occur. Patients should be closely observed, and if there  
474 is any abnormality, the medicinal product should be discontinued and proper action should be taken.
- 475 4) Blood: Rarely aplastic anaemia, anaemia, leukopenia, thrombocytopenia, platelet dysfunction  
476 (prolonged bleeding time) may occur. Patients should be closely observed, and if there is any  
477 abnormality, the medicinal product should be discontinued and proper action should be taken.  
478 Hemolysis and hemolytic anaemia in patients with severe forms of glucose-6-phosphate dehydrogenase  
479 (G6PD) deficiency has been reported.
- 480 5) Gastrointestinal: Anorexia, heartburn, stomachache, nausea and vomiting may occur. Long-term use  
481 may induce gastrointestinal events, especially gastrointestinal bleeding, peptic ulcer, and abreaction  
482 (perforation).
- 483 6) Psycho-neurotic: Tinnitus, hearing loss, dizziness, headache, and excitement may occur. If any of these  
484 symptoms occurs, the dose should be reduced or the medicinal product should be discontinued.
- 485 7) Liver: Rarely hepatic impairment may occur. Transient hepatic impairment with increase in liver  
486 transaminases has very rarely been reported.
- 487 8) Kidney: Renal impairment and acute renal failure have been reported.
- 488 9) Miscellaneous: Hyperpnea or metabolic acidosis may significantly increase the blood levels. The dose  
489 should be reduced or the medicinal product should be discontinued.

490 The information on drugs to be used in the clinical study including precautions for use is in Appendix 3, 4,  
491 and 5. The safety of all the study drugs to be used, with ingredients approved and marketed worldwide, is  
492 sufficiently guaranteed.

### 493 9.3 Concomitant medications

494 For any drug that will be concomitantly used from the consent obtainment through the end of the treatment

495 with the investigational product (Week 5; 37 ± 1 days) and may affect the endpoints, including hypertension,  
496 hyperlipidemia, diabetes and antiplatelet drugs, its prescription name, drug name, treatment duration, dosage  
497 and administration should be recorded.

#### 498 **9.4 Prohibited Concomitant Medications or Medications Requiring Caution**

499 Drugs which can increase or decrease the effect of the investigational products such as CYP3A4 and P-gp  
500 inducers/inhibitors should be avoided. If concomitant use of these drugs is known, it should be immediately  
501 reported to the principal investigator. More information is described in Appendix 3, 4, and 5.

### 502 **10 Safety Assessment**

503 For adverse drug reactions reported in previous studies and unexpected adverse drug reactions that have not  
504 been verified in previous studies, the occurrence/non-occurrence and severity of each case will be checked,  
505 assessed and reported to the IRB and Seoul Asan Medical Center in accordance with the applicable  
506 regulations.

#### 507 **10.1 Definition of Adverse Event**

508 An adverse event is defined as any untoward or undesirable sign (e.g., abnormalities in clinical laboratory  
509 test), symptom or disease occurring in a subject who are given the investigational product, and it does not  
510 necessarily have to have a causal relationship with the investigational product used in the clinical study. Any  
511 sign, symptom or disease occurring before subjects using the investigational product will not be considered  
512 as an adverse event.

#### 513 **10.2 Adverse Event Reporting Period**

514 The period of adverse event collection in this study is from randomization to the post-study visit.

#### 515 **10.3 Serious Adverse Event (SAE)**

516 A serious adverse event (SAE) means the following adverse events or adverse drug reactions occurring at  
517 any dose of the investigational product:

- 518 - fatal or life-threatening;
- 519 - requiring inpatient hospitalization or prolongation of existing hospitalization;
- 520 - resulting in persistent or significant disability/incapacity;
- 521 - constituting a congenital anomaly/birth defect; or
- 522 - including other important medical events.

523 \* However, pre-planned hospitalization does not constitute a serious adverse event.

#### 524 **10.4 Adverse Event Reporting Procedure**

525 The principal investigator and subinvestigator should report all serious adverse events occurring during the  
526 study period to the applicable study center's IRB in accordance with the applicable local regulations  
527 regardless of causal relationship with the investigational product. The serious adverse event report form  
528 signed or provided by e-mail should be completed and reported to Asan Medical Center, the CRO, in one  
529 business day of knowledge. Any new information on serious adverse events until they are resolved should be  
530 reported to the center's IRB and CRO.

#### 531 **10.5 Assessment of Adverse Event Severity**

|                     |                                                                |
|---------------------|----------------------------------------------------------------|
| Severity Assessment | Severity of adverse events will be classified according to the |
|---------------------|----------------------------------------------------------------|

|  |                                                                                                                                                                                                                                                                                                                                                                                                                                                                                                                                         |
|--|-----------------------------------------------------------------------------------------------------------------------------------------------------------------------------------------------------------------------------------------------------------------------------------------------------------------------------------------------------------------------------------------------------------------------------------------------------------------------------------------------------------------------------------------|
|  | <p>following criteria based on maximal intensity.</p> <ol style="list-style-type: none"> <li>1) Mild: adverse event which does not interfere with the subject's normal activities of daily living, causes minimum inconvenience, and is easily bearable</li> <li>2) Moderate: adverse event which causes considerable inconvenience to significantly interfere with the subject's normal activities of daily living</li> <li>3) Severe: adverse event which makes the subject's normal activities of daily living impossible</li> </ol> |
|--|-----------------------------------------------------------------------------------------------------------------------------------------------------------------------------------------------------------------------------------------------------------------------------------------------------------------------------------------------------------------------------------------------------------------------------------------------------------------------------------------------------------------------------------------|

532 **10.6 Assessment of Causal Relationship**

| <p>Assessment of causal relationship with the investigational product</p> | <p>Causal relationship with the investigational product will be classified into 6 levels as follows and the principal investigator or subinvestigator's opinion will be added.</p> <p>The causal relationship with the investigational product will be classified into one of the following six categories and the principal investigator's or investigator's opinion will be added.</p>                                                                                                                                                                                                                                                                                                                                                                                                                                                                                                                                                                                                                                                                                                                                                                                                                                                                                                                                                                                                                                                                                                                                                                                                                                                                                                                                                                                                                                                                                                                                                                                                                                                                                                                                                                                                                                                                                                    |                     |           |         |                                                                                                                                                                                                                                                                                                                                                                                                                                    |                                     |                                                                                                                                                                                                                                                                                                                                                                                             |          |                                                                                                                                                                                                                                                                                                                    |          |                                                                                                                                                                                                                                                        |      |                                                                                                                                                                                                                  |                              |                                                                                                                                                                                                       |
|---------------------------------------------------------------------------|---------------------------------------------------------------------------------------------------------------------------------------------------------------------------------------------------------------------------------------------------------------------------------------------------------------------------------------------------------------------------------------------------------------------------------------------------------------------------------------------------------------------------------------------------------------------------------------------------------------------------------------------------------------------------------------------------------------------------------------------------------------------------------------------------------------------------------------------------------------------------------------------------------------------------------------------------------------------------------------------------------------------------------------------------------------------------------------------------------------------------------------------------------------------------------------------------------------------------------------------------------------------------------------------------------------------------------------------------------------------------------------------------------------------------------------------------------------------------------------------------------------------------------------------------------------------------------------------------------------------------------------------------------------------------------------------------------------------------------------------------------------------------------------------------------------------------------------------------------------------------------------------------------------------------------------------------------------------------------------------------------------------------------------------------------------------------------------------------------------------------------------------------------------------------------------------------------------------------------------------------------------------------------------------|---------------------|-----------|---------|------------------------------------------------------------------------------------------------------------------------------------------------------------------------------------------------------------------------------------------------------------------------------------------------------------------------------------------------------------------------------------------------------------------------------------|-------------------------------------|---------------------------------------------------------------------------------------------------------------------------------------------------------------------------------------------------------------------------------------------------------------------------------------------------------------------------------------------------------------------------------------------|----------|--------------------------------------------------------------------------------------------------------------------------------------------------------------------------------------------------------------------------------------------------------------------------------------------------------------------|----------|--------------------------------------------------------------------------------------------------------------------------------------------------------------------------------------------------------------------------------------------------------|------|------------------------------------------------------------------------------------------------------------------------------------------------------------------------------------------------------------------|------------------------------|-------------------------------------------------------------------------------------------------------------------------------------------------------------------------------------------------------|
|                                                                           | <table border="1" style="width: 100%;"> <thead> <tr> <th style="width: 30%;">Causal Relationship</th> <th>Rationale</th> </tr> </thead> <tbody> <tr> <td>Certain</td> <td> <ul style="list-style-type: none"> <li>• There is reasonable temporal relationship between drug administration and onset of an AE</li> <li>• The AE cannot be explained by other drugs, chemicals or concurrent diseases</li> <li>• The AE shows clinically reasonable response when the subject stops the drug</li> <li>• The AE is medically and phenomenally confirmed by rechallenge of the drug (only if feasible)</li> </ul> </td> </tr> <tr> <td>Probable /Likely (Probable /Likely)</td> <td> <ul style="list-style-type: none"> <li>• There is reasonable temporal relationship between drug administration and onset of an AE</li> <li>• The AE does not appear to be related to other drugs, chemicals or concurrent disease</li> <li>• The AE shows clinically reasonable response when the subject stops the drug</li> <li>• Information on rechallenge is not available.</li> </ul> </td> </tr> <tr> <td>Possible</td> <td> <ul style="list-style-type: none"> <li>• There is reasonable temporal relationship between drug administration and onset of an AE</li> <li>• The AE can be also explained by other drugs, chemicals or concurrent diseases.</li> <li>• Information on stopping the drug is not sufficient or available.</li> </ul> </td> </tr> <tr> <td>Unlikely</td> <td> <ul style="list-style-type: none"> <li>• The AE is a transient response which is unlikely to be related to drug administration</li> <li>• The AE can be also reasonably explained by other drugs, chemicals or potential underlying disease</li> </ul> </td> </tr> <tr> <td>None</td> <td> <ul style="list-style-type: none"> <li>• The AE occurs when the patient is not taking the drug.</li> <li>• The AE occurring before the patient takes the drug is not worsened after use of the device</li> </ul> </td> </tr> <tr> <td>Unassessable/ Unclassifiable</td> <td> <ul style="list-style-type: none"> <li>• Because information is insufficient or contraindicated, the information cannot be verified; and no further information is available or confirmed.</li> </ul> </td> </tr> </tbody> </table> | Causal Relationship | Rationale | Certain | <ul style="list-style-type: none"> <li>• There is reasonable temporal relationship between drug administration and onset of an AE</li> <li>• The AE cannot be explained by other drugs, chemicals or concurrent diseases</li> <li>• The AE shows clinically reasonable response when the subject stops the drug</li> <li>• The AE is medically and phenomenally confirmed by rechallenge of the drug (only if feasible)</li> </ul> | Probable /Likely (Probable /Likely) | <ul style="list-style-type: none"> <li>• There is reasonable temporal relationship between drug administration and onset of an AE</li> <li>• The AE does not appear to be related to other drugs, chemicals or concurrent disease</li> <li>• The AE shows clinically reasonable response when the subject stops the drug</li> <li>• Information on rechallenge is not available.</li> </ul> | Possible | <ul style="list-style-type: none"> <li>• There is reasonable temporal relationship between drug administration and onset of an AE</li> <li>• The AE can be also explained by other drugs, chemicals or concurrent diseases.</li> <li>• Information on stopping the drug is not sufficient or available.</li> </ul> | Unlikely | <ul style="list-style-type: none"> <li>• The AE is a transient response which is unlikely to be related to drug administration</li> <li>• The AE can be also reasonably explained by other drugs, chemicals or potential underlying disease</li> </ul> | None | <ul style="list-style-type: none"> <li>• The AE occurs when the patient is not taking the drug.</li> <li>• The AE occurring before the patient takes the drug is not worsened after use of the device</li> </ul> | Unassessable/ Unclassifiable | <ul style="list-style-type: none"> <li>• Because information is insufficient or contraindicated, the information cannot be verified; and no further information is available or confirmed.</li> </ul> |
| Causal Relationship                                                       | Rationale                                                                                                                                                                                                                                                                                                                                                                                                                                                                                                                                                                                                                                                                                                                                                                                                                                                                                                                                                                                                                                                                                                                                                                                                                                                                                                                                                                                                                                                                                                                                                                                                                                                                                                                                                                                                                                                                                                                                                                                                                                                                                                                                                                                                                                                                                   |                     |           |         |                                                                                                                                                                                                                                                                                                                                                                                                                                    |                                     |                                                                                                                                                                                                                                                                                                                                                                                             |          |                                                                                                                                                                                                                                                                                                                    |          |                                                                                                                                                                                                                                                        |      |                                                                                                                                                                                                                  |                              |                                                                                                                                                                                                       |
| Certain                                                                   | <ul style="list-style-type: none"> <li>• There is reasonable temporal relationship between drug administration and onset of an AE</li> <li>• The AE cannot be explained by other drugs, chemicals or concurrent diseases</li> <li>• The AE shows clinically reasonable response when the subject stops the drug</li> <li>• The AE is medically and phenomenally confirmed by rechallenge of the drug (only if feasible)</li> </ul>                                                                                                                                                                                                                                                                                                                                                                                                                                                                                                                                                                                                                                                                                                                                                                                                                                                                                                                                                                                                                                                                                                                                                                                                                                                                                                                                                                                                                                                                                                                                                                                                                                                                                                                                                                                                                                                          |                     |           |         |                                                                                                                                                                                                                                                                                                                                                                                                                                    |                                     |                                                                                                                                                                                                                                                                                                                                                                                             |          |                                                                                                                                                                                                                                                                                                                    |          |                                                                                                                                                                                                                                                        |      |                                                                                                                                                                                                                  |                              |                                                                                                                                                                                                       |
| Probable /Likely (Probable /Likely)                                       | <ul style="list-style-type: none"> <li>• There is reasonable temporal relationship between drug administration and onset of an AE</li> <li>• The AE does not appear to be related to other drugs, chemicals or concurrent disease</li> <li>• The AE shows clinically reasonable response when the subject stops the drug</li> <li>• Information on rechallenge is not available.</li> </ul>                                                                                                                                                                                                                                                                                                                                                                                                                                                                                                                                                                                                                                                                                                                                                                                                                                                                                                                                                                                                                                                                                                                                                                                                                                                                                                                                                                                                                                                                                                                                                                                                                                                                                                                                                                                                                                                                                                 |                     |           |         |                                                                                                                                                                                                                                                                                                                                                                                                                                    |                                     |                                                                                                                                                                                                                                                                                                                                                                                             |          |                                                                                                                                                                                                                                                                                                                    |          |                                                                                                                                                                                                                                                        |      |                                                                                                                                                                                                                  |                              |                                                                                                                                                                                                       |
| Possible                                                                  | <ul style="list-style-type: none"> <li>• There is reasonable temporal relationship between drug administration and onset of an AE</li> <li>• The AE can be also explained by other drugs, chemicals or concurrent diseases.</li> <li>• Information on stopping the drug is not sufficient or available.</li> </ul>                                                                                                                                                                                                                                                                                                                                                                                                                                                                                                                                                                                                                                                                                                                                                                                                                                                                                                                                                                                                                                                                                                                                                                                                                                                                                                                                                                                                                                                                                                                                                                                                                                                                                                                                                                                                                                                                                                                                                                          |                     |           |         |                                                                                                                                                                                                                                                                                                                                                                                                                                    |                                     |                                                                                                                                                                                                                                                                                                                                                                                             |          |                                                                                                                                                                                                                                                                                                                    |          |                                                                                                                                                                                                                                                        |      |                                                                                                                                                                                                                  |                              |                                                                                                                                                                                                       |
| Unlikely                                                                  | <ul style="list-style-type: none"> <li>• The AE is a transient response which is unlikely to be related to drug administration</li> <li>• The AE can be also reasonably explained by other drugs, chemicals or potential underlying disease</li> </ul>                                                                                                                                                                                                                                                                                                                                                                                                                                                                                                                                                                                                                                                                                                                                                                                                                                                                                                                                                                                                                                                                                                                                                                                                                                                                                                                                                                                                                                                                                                                                                                                                                                                                                                                                                                                                                                                                                                                                                                                                                                      |                     |           |         |                                                                                                                                                                                                                                                                                                                                                                                                                                    |                                     |                                                                                                                                                                                                                                                                                                                                                                                             |          |                                                                                                                                                                                                                                                                                                                    |          |                                                                                                                                                                                                                                                        |      |                                                                                                                                                                                                                  |                              |                                                                                                                                                                                                       |
| None                                                                      | <ul style="list-style-type: none"> <li>• The AE occurs when the patient is not taking the drug.</li> <li>• The AE occurring before the patient takes the drug is not worsened after use of the device</li> </ul>                                                                                                                                                                                                                                                                                                                                                                                                                                                                                                                                                                                                                                                                                                                                                                                                                                                                                                                                                                                                                                                                                                                                                                                                                                                                                                                                                                                                                                                                                                                                                                                                                                                                                                                                                                                                                                                                                                                                                                                                                                                                            |                     |           |         |                                                                                                                                                                                                                                                                                                                                                                                                                                    |                                     |                                                                                                                                                                                                                                                                                                                                                                                             |          |                                                                                                                                                                                                                                                                                                                    |          |                                                                                                                                                                                                                                                        |      |                                                                                                                                                                                                                  |                              |                                                                                                                                                                                                       |
| Unassessable/ Unclassifiable                                              | <ul style="list-style-type: none"> <li>• Because information is insufficient or contraindicated, the information cannot be verified; and no further information is available or confirmed.</li> </ul>                                                                                                                                                                                                                                                                                                                                                                                                                                                                                                                                                                                                                                                                                                                                                                                                                                                                                                                                                                                                                                                                                                                                                                                                                                                                                                                                                                                                                                                                                                                                                                                                                                                                                                                                                                                                                                                                                                                                                                                                                                                                                       |                     |           |         |                                                                                                                                                                                                                                                                                                                                                                                                                                    |                                     |                                                                                                                                                                                                                                                                                                                                                                                             |          |                                                                                                                                                                                                                                                                                                                    |          |                                                                                                                                                                                                                                                        |      |                                                                                                                                                                                                                  |                              |                                                                                                                                                                                                       |
|                                                                           | <p>Robustness of relationship between the AE and investigational product (or</p>                                                                                                                                                                                                                                                                                                                                                                                                                                                                                                                                                                                                                                                                                                                                                                                                                                                                                                                                                                                                                                                                                                                                                                                                                                                                                                                                                                                                                                                                                                                                                                                                                                                                                                                                                                                                                                                                                                                                                                                                                                                                                                                                                                                                            |                     |           |         |                                                                                                                                                                                                                                                                                                                                                                                                                                    |                                     |                                                                                                                                                                                                                                                                                                                                                                                             |          |                                                                                                                                                                                                                                                                                                                    |          |                                                                                                                                                                                                                                                        |      |                                                                                                                                                                                                                  |                              |                                                                                                                                                                                                       |

other causes, progression of the underlying disease, and concomitant treatment) will be determined according to how well the AE can be explained from the perspective below:

- known pharmacological action of the investigational product
- previous effect similar to the one observed in the investigational products or similar drugs
- responses often reported to be related to similar drugs (e.g. vascular disease)
- response related to duration of treatment with the drug (disappearing during the interruption of the treatment and recurring after rechallenge)

533 **11 Statistical Analysis**

534 **11.1 Sample Size**

| Treatment group   | Sample size |
|-------------------|-------------|
| Warfarin group    | 98          |
| Rivaroxaban group | 98          |

535 **11.2 Rationale for Sample Size**

536 This is an exploratory study to assess the effects of rivaroxaban versus warfarin on ischemia, bleeding and  
537 hospital stay in acute cerebral infarction patients with nonvalvular atrial fibrillation. With a new design to  
538 compare the effects of warfarin and rivaroxaban in acute cerebral infarction patients, the study basically  
539 compares the incidence of 1) intracranial bleeding and 2) ischemic lesions observed on the brain imaging.

540 Direct quotation is difficult due to few studies of acute cerebral infarction patients, but a study to compare  
541 the effects of rivaroxaban versus warfarin on the incidence of ischemia and bleeding in cerebral infarction  
542 patients showed the incidence of clinically significant intracranial bleeding was significantly lower in the  
543 rivaroxaban group than in the warfarin group (0.5 cases per year vs. 0.7 cases per year) (hazard ratio 0.67, 95%  
544 CI; 0.47-0.93). Previous studies from which the incidence of cerebral infarction or cerebral bleeding caused  
545 by aspirin plus warfarin in acute cardiogenic embolism include the International Stroke Trial<sup>16</sup>. This study  
546 revealed the incidence of recurrent cerebral infarction and cerebral bleeding within 14 days in the aspirin  
547 alone group is 4.9% and 0.4%, respectively. It also reported the incidence of recurrent lesions, intracranial  
548 bleeding or death was 20.7%. Based on those results, it is assumed that the incidence of recurrent cerebral  
549 infarction or brain bleeding is 5% and the incidence of ischemic brain lesions or bleeding lesions observed  
550 on MRI is 25-30%.

551 This study is not for confirmatory validation of the effects of the two drugs but for exploratory verification to  
552 see whether the effects of rivaroxaban is equivalent to those of warfarin. This study will consider the  
553 minimum difference in the effect that will allow further study, and will develop a hypothesis to continue  
554 further study only if rivaroxaban can reduce the incidence of ischemic or haemorrhagic brain lesions  
555 observed on MRI at least by 15-20% compared to warfarin.

556 Direct quotation of previous study results is difficult, but it is assumed that the incidence of intracranial  
557 bleeding or recurrent ischemic lesions confirmed by brain imaging is 25~30%. Based on the assumption, the  
558 sample size required to be able to verify the difference in the effect between warfarin and rivaroxaban is  
559 15~20% is as follows:

|                               |                                                                                                                                  |
|-------------------------------|----------------------------------------------------------------------------------------------------------------------------------|
| <b>Null hypothesis</b>        | The effect of rivaroxaban on the reduced incidence of intracranial bleeding and ischemic lesions is similar to that of warfarin. |
| <b>Alternative hypothesis</b> | Rivaroxaban will reduce the incidence of intracranial bleeding and ischemic lesions at least by 15~20% compared to warfarin.     |

560 In order to calculate the expected sample size with the 5% (one-sided) significance level and 80% power:

- 561 1) 89 subjects are required per group for hypothesis testing if it is assumed the incidence of intracranial  
562 bleeding or recurrent ischemic lesions is 25% and the least significant difference (LSD) is 15%;
- 563 2) 56 subjects are required for hypothesis testing if it is assumed the incidence of intracranial bleeding or

564 recurrent ischemic lesions is 30% and the LSD is 20%.

565 Considering dropout and inaccurate expected incidence of events due to a lack of previous studies, it is  
566 planned to recruit 98 subjects per group.

### 567 **11.3 General Principles of Statistical Analysis Method**

568 For all the variables used for this study, the frequency and proportion of categorical data will be presented,  
569 and the summary statistics of continuous data will be provided using the mean and standard deviation. The  
570 basic method for all statistical tests to be used for analyses will be two-sided tests except for the primary  
571 endpoints (the recurrent incidence of intracranial bleeding and ischemic lesions). The statistical significance  
572 will be tested at a 5% significance level, and, if necessary, a two-sided 95% confidence interval will be  
573 provided.

574 If the variables are verified that show the difference between the groups after randomization including age  
575 and baseline test results except for efficacy and safety analyses, a regression model will be introduced which  
576 can adjust and analyse the risk or prognostic factors for endpoints.

#### 577 - Analysis set

578 The analysis sets required to assess the efficacy and safety in this study will be compliant with the local  
579 and international standards. The efficacy analysis will include both the ITT and PP analysis sets as  
580 defined below; the safety analysis will be defined and carried out as below:

#### 581 - Efficacy analysis set:

##### 582 1) Modified intention to treat (modified ITT)

583 The modified ITT is defined as all subjects randomized after giving the consent to participation in the  
584 study. However, the subjects who have never taken the investigational products (warfarin and  
585 rivaroxaban) or had no efficacy endpoints measured in the ITT set even after taking the investigational  
586 products will be excluded from the analysis.

##### 587 2) Per protocol (PP)

588 The subjects in the modified ITT, who do not violate the inclusion/exclusion criteria and have  
589 rivaroxaban or warfarin compliance of  $\geq 80\%$  will be included in the analysis.

590 The efficacy analysis will be performed for both ITT and PP analysis sets and the analysis results will be  
591 presented in the clinical study report.

#### 592 - Safety analysis set:

593 The safety analysis set is defined as all the subjects who are randomized after giving consent to  
594 participation in the study and have taken the investigational product (warfarin or rivaroxaban) at least  
595 once.

#### 596 - Handling of Missing value

597 If there is any missing value regarding the efficacy endpoints including the primary endpoint, the  
598 missing value will be excluded and the analysis will be carried out. For variables other than the primary  
599 efficacy endpoint, missing values will be handled using LOCF (last observed carried forward); for the  
600 safety endpoints, LOCF will not be used.

### 601 **11.4 Efficacy and Safety Endpoint Analysis Methods**

#### 602 1) Efficacy endpoints

##### 603 - Primary efficacy endpoint

604 The primary endpoint of this study is defined as the incidence of 1) intracranial bleeding or 2) recurrent  
605 ischemic lesions based on brain imaging taken at Week 4. For inter-group comparison, the difference  
606 will be tested as described above: the LSD of 15% will be established if the incidence of bleeding and  
607 ischemic lesions is about 25%, and the LSD of 20% will be established if the incidence is about 30%.



608 - Secondary efficacy endpoints

609 The secondary endpoints will be compared by the following methods:

610 1) inter-group comparison of the incidence of intracranial bleeding confirmed by brain imaging at Week 4  
611 and 2) for inter-group comparison of the incidence of recurrent ischemic lesions confirmed by brain imaging  
612 at Week 4, chi-square test or Fisher's exact test will be used.

613 3) Total number of days of hospital stay after randomization: t-test and log-rank test

614 4) For inter-group comparison of the incidence of major bleeding and acute artery syndrome (myocardial  
615 infarction or unstable angina), chi-square test or Fisher's exact test will be used.

616 5) Incidence of major vascular events: For stroke, myocardial infarction or vascular death, the incidence will  
617 be tested by chi-square test of Fisher's exact test. If the time of the event is measured, the incidence is  
618 assumed by the Kaplan-Meier method and compared by the log-rank test.

619 4) The incidence of 4) major vascular events and major bleeding and 5) clinical ischemic events will be  
620 compared between the groups by chi-square test or Fisher's exact test.

621 6) mRS scores at Week 4 (30 ± 5 days) will be compared by chi-square test or nonparametric method.

622

623 2) Safety endpoints

624 The safety analysis will be carried out based on all adverse events, clinical laboratory results, NHISS, 12-  
625 lead ECG and vital signs (SBP/DBP and pulse) collected from the subjects.

626 All safety variable data above collected during baseline, randomization and treatment will be provided by  
627 time point when the safety endpoints are measured and by patient, and the summary statistics will be  
628 presented. The adverse events observed after use of the investigational product will be summarized. The  
629 number of patients who have experienced adverse events, adverse drug reactions, serious adverse events,  
630 death, adverse events causing study discontinuation, and/or "other significant adverse events (OAEs) will be  
631 summarized by group. The number of subjects who developed each adverse event will be summarized by  
632 group using the recommended terms (e.g. MedDRA) by SOC and by maximum severity. Apart from  
633 summary statistics, the intergroup incidence and number of adverse events will be assessed using the chi-  
634 square test, Fisher's exact test or Poisson regression analysis. The incidence of abnormal laboratory results,  
635 NIHSS, and 12-lead ECG will be analyzed using the chi-square test, Fisher's exact test or Poisson regression  
636 analysis to compare the incidence of abnormalities between the groups at each time point. For vital signs,  
637 summary statistics of continuous data will be presented at each time point, and intergroup comparison will be  
638 carried out using the generalized linear model (GLM) or generalized linear mixed model (GLMM).

## 639 12 Measurement of Investigational Product Compliance

640 Based on the drug purchase receipts for the treatment group, the number of days when the drugs should be  
641 taken will be documented. At Day 5 and Week 4 OPD visit, the number of days when the drugs were  
642 actually taken will be stated based on the number of the returned drugs to verify drug compliance.  
643 Compliance will be calculated based on the medication history of warfarin and rivaroxaban.

$$\text{Adherence (\%)} = \frac{\text{No. of days when drugs were actually taken}}{\text{No. of days when drugs should be taken}} \times 100$$

644

## 645 13 Premature Termination and Withdrawal Criteria

646 The principal investigator may terminate the study participation of the subject or withdraw him/her from the  
647 study in any of the followings:

648 ✓ the principal investigator judges that the study participation of the subject should be terminated due to  
649 an adverse event;

- 650 ✓ the principal investigator judges that the study participation of the subject should be terminated due to  
651 exacerbation of the symptom;
- 652 ✓ the subject is proven ineligible for the study after the beginning of the study; or
- 653 ✓ the principal investigator considers it inappropriate to continue the study.
- 654 ✓ the subject becomes pregnant during participation in the study

655 Treatment after study treatment completion/termination/withdrawal should be carried out according to the  
656 investigator's discretion. In case of study end/termination/withdrawal due to onset of an adverse event or for  
657 a safety reason, the adverse event should be followed up until it is resolved if possible, and the relative  
658 matters should be recorded in the CRF.

## 659 **14 Efficacy Analysis**

- 660 1. Imaging results should be collected from the centralised server so that they can be analysed and  
661 interpreted by the IIRC. Data supplementation can be requested during the analysis and interpretation; if  
662 so, the center should reply and/or deliver supplementation data as soon as possible.
- 663 2. The hospital stay should be recorded in a unit of day based on each center's medical records.

## 664 **15 Measures To Ensure Subject Safety**

665 The study center must take all possible measures to ensure subject safety, being equipped with all equipment  
666 and professionals required for the clinical study to be properly conducted according to all the applicable  
667 regulations as specified in the protocol. The subinvestigators must be fully aware of adverse events and  
668 precautions prescribed in the protocol before the study initiation. If a serious adverse event occurs during the  
669 study, they must immediately discontinue the study participation of the subject in question, take an  
670 appropriate measure and inform IRB of the event.

## 671 **16 Subject Informed Consent Form, Compensation and Subject Care and** 672 **Treatment after End of Study**

### 673 **16.1 Subject Information and Informed Consent Form**

674 The investigator should provide sufficient information on the clinical study and efficacy and safety of the  
675 investigational product for the potential subject, obtain the consent form dated and signed by the subject (if  
676 necessary, his/her representative) under the subject's voluntary consent, and provide one copy each of the  
677 informed consent form and subject information sheet before the subject's participation in the study. If the  
678 subject or his/her representative cannot read, an impartial witness is required. Also, the subject information  
679 sheet and consent form to be provided for the subject should be used only after approved by each study  
680 center's IRB.

### 681 **16.2 Agreement on Compensation**

682 If any adverse event induced by the clinical study causes an injury to the subject, the sponsor will provide  
683 compensation according to the agreement on subject compensation.

### 684 **16.3 Subject Care and Treatment After Completion of the Study**

685 The care and treatment of the subject who has completed the study will comply with the routine medical care  
686 and treatment practices. After the end of this study, further treatment will be determined based on the subject'  
687 clinical condition and the study doctor's discretion.

## 688 **17 Considerations for safe and scientific conduct of the study**

### 689 **17.1 Compliance with Protocol and Protocol Amendment**

690 This study will be conducted according to the protocol approved by the IRB and MFDS. All amendments to  
691 the protocol will be determined through discussion between the sponsor and the principal investigator. The  
692 investigator should obtain the prior approval for any amendment to the protocol except for immediate  
693 prevention of harm to the subject. However, if the protocol is amended and used before the approval from the  
694 regulatory authorities for immediate prevention of harm to the subject, this amendment should be reported to  
695 the regulatory authorities as soon as possible.

696 If the protocol cannot be complied with during the study for an unavoidable reason along with violation for  
697 the sake of subject safety, the investigator should record the violation in the source documents and CRF,  
698 inform it to the CRO and monitor, and appropriately report it to the regulatory authorities according to each  
699 study center's regulations. The CRO, after receiving report on violation, will decide whether or not to  
700 continue the study for the concerned subject and inform the investigator.

## 701 **17.2 Study Monitoring**

702 This study is an investigator-initiated trial, and the CRO will provide appropriate study conduct guidelines  
703 for each participating center and designate the monitor who will monitor the study and carry out monitoring  
704 through visits to study centers before and during the study or web-based CRFs. The monitoring schedule will  
705 be determined through discussion with the person in charge from the applicable center, and whether the study  
706 is being conducted appropriately according to the protocol and applicable regulations will be checked at  
707 monitoring visit. Any finding at monitoring, if necessary, should be appropriately resolved through  
708 discussion with the investigator.

## 709 **17.3 Retention of Clinical Study-related Documents and Data**

710 The principal investigator is responsible for maintaining and providing essential study documents. An  
711 essential study document means a document that enables individual or full assessment of study conduct and  
712 quality of the resulting data. Essential study documents include all source documents, monitoring records  
713 and appointment schedule, correspondences exchanged between the sponsor and investigator, and documents  
714 set forth by the GCP. Source documents include all observation records, clinical study activity records, and  
715 all reports and records required for assessment and reconstruction. Therefore, the records on all the  
716 treatments and procedures performed based on the protocol and all similar records are also included in  
717 source documents. The study center should retain the documents related to the study for three years from the  
718 study end date.

## 719 **17.4 Confidentiality of Clinical Study Data and Subject Records**

720 All the subjects' names should be kept confidential, and the subjects should be managed and evaluated using  
721 the code number and initials given at the beginning of the study. All the records on the subjects' identities  
722 should be managed in the way to keep them confidential. However, the monitor, auditor, IRB, and a person  
723 designated by the MFDS can have access to the records on the subjects to validate reliability of the study  
724 procedures and data to the extent provided by the applicable regulations which does not breach subject  
725 confidentiality.

726 **18 REFERENCES**

- 727 1. Wolf PA, Abbott RD, Kannel WB. Atrial fibrillation as an independent risk factor for stroke: the  
728 Framingham Study. *Stroke*. 1991 Aug;22(8):983-8.
- 729 2. Lee BC, Roh JK. International experience in stroke registries: Korean Stroke Registry. *Am J Prev Med*.  
730 2006 Dec;31(6 Suppl 2):S243-5.
- 731 3. Wolf PA, Abbott RD, Kannel WB. Atrial fibrillation: a major contributor to stroke in the elderly. The  
732 Framingham Study. *Arch Intern Med*. 1987 Sep;147(9):1561-4.
- 733 4. Hart RG, Benavente O, McBride R, Pearce LA. Antithrombotic therapy to prevent stroke in patients  
734 with atrial fibrillation: a meta-analysis. *Ann Intern Med*. 1999 Oct 5;131(7):492-501.
- 735 5. Hart RG, Pearce LA, Aguilar MI. Meta-analysis: antithrombotic therapy to prevent stroke in patients  
736 who have nonvalvular atrial fibrillation. *Ann Intern Med*. 2007 Jun 19;146(12):857-67.
- 737 6. Singer DE, Albers GW, Dalen JE, Fang MC, Go AS, Halperin JL, et al. Antithrombotic therapy in atrial  
738 fibrillation: American College of Chest Physicians Evidence-Based Clinical Practice Guidelines (8th  
739 Edition). *Chest*. 2008 Jun;133(6 Suppl):546S-92S.
- 740 7. Cardiogenic brain embolism. Cerebral Embolism Task Force. *Arch Neurol*. 1986 Jan;43(1):71-84.
- 741 8. Yoo SH, Nah HW, Jo MW, Kang DW, Kim JS, Koh JY, et al. Age and body weight adjusted warfarin  
742 initiation program for ischaemic stroke patients. *Eur J Neurol*. 2009 Oct;16(10):1100-5.
- 743 9. Yoo SH, Kwon SU, Jo MW, Kang DW, Kim JS. Age- and weight-adjusted warfarin initiation  
744 nomogram for ischaemic stroke patients. *Eur J Neurol*. 2012 Dec;19(12):1547-53.
- 745 10. Jauch EC, Saver JL, Adams HP, Jr., Bruno A, Connors JJ, Demaerschalk BM, et al. Guidelines for the  
746 early management of patients with acute ischemic stroke: a guideline for healthcare professionals from  
747 the American Heart Association/American Stroke Association. *Stroke*. 2013 Mar;44(3):870-947.
- 748 11. Lee JH, Park KY, Shin JH, Cha JK, Kim HY, Kwon JH, et al. Symptomatic hemorrhagic transformation  
749 and its predictors in acute ischemic stroke with atrial fibrillation. *Eur Neurol*. 2010;64(4):193-200.
- 750 12. Broderick JP, Hacke W. Treatment of acute ischemic stroke: Part II: neuroprotection and medical  
751 management. *Circulation*. 2002 Sep 24;106(13):1736-40.
- 752 13. Patel MR, Mahaffey KW, Garg J, Pan G, Singer DE, Hacke W et al. Rivaroxaban versus warfarin in  
753 nonvalvular atrial fibrillation. *N Engl J Med*. 2011 Sep 8;365(10):883-91.
- 754 14. Mackman N. The role of tissue factor and factor VIIa in hemostasis. *Anesth Analg*. 2009  
755 May;108(5):1447-52.
- 756 15. Carlo Patrono et al. Platelet-Active Drugs: The Relationships Among Dose, Effectiveness, and Side  
757 Effects. The Seventh ACCP Conference on Antithrombotic and Thrombolytic Therapy. 2004
- 758 16. L. Azoulay et al. Initiation of warfarin in patients with atrial fibrillation: early effects on ischaemic  
759 strokes. *Eur Heart J*. 2013 Dec; doi:10.1093/eurheartj/eh499

760

1  
2  
3  
4

# STATISTICAL ANALYSIS PLAN

---

**Rivaroxaban versus Warfarin in acute ischemic stroke with atrial fibrillation: Acute stroke with Xarelto to reduce intracranial bleeding, recurrent embolic stroke, and hospital stay, phase 2, conceptual multicenter trial**

---

5  
6  
7  
8  
9  
10  
11  
12  
13  
14  
15  
16  
17  
18

## **Triple-AXEL Study Clinical Trial No. LMI-2013-1013**

19  
20  
21  
22  
23

Author: Ji Sung Lee, Ph.D., Clinical Research Center, Asan Medical Center

Version: 1.0

Issue/Report Date: 2016.02.25

24  
25

**Compliance:** The study described in this report was performed according to the principles of Good Clinical Practice (GCP).

26  
27  
28  
29  
30  
31  
32

---

### **Confidentiality Statement**

The information in this document contains trade secrets and commercial information that are privileged or confidential and may not be disclosed unless such disclosure is required by applicable law or regulations. In any event, persons to whom the information is disclosed must be informed that the information is privileged or confidential and may not be further disclosed by them. These restrictions on disclosure will apply equally to all future information supplied to you that is indicated as privileged or confidential.

33  
34

## SIGNATURE PAGE

35  
36  
37  
38  
39  
40  
41  
42  
43  
44  
45  
46  
47

Prepared by :



---

Ji Sung Lee, Ph.D. / Biostatistician  
Clinical Research Center, Asan Medical Center

2016/02/25

---

Date (yyyy/mm/dd)

Reviewed & Approved by :

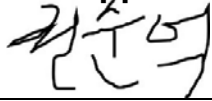

---

Sun U. Kwon, MD, Ph.D. / Principal Investigator  
Department of Neurology, Asan Medical Center

2016/02/25

---

Date (yyyy/mm/dd)

48  
49

50  
51  
52  
53  
54  
55  
56  
57  
58  
59  
60  
61  
62  
63  
64  
65  
66  
67  
68  
69  
70  
71  
72  
73  
74  
75  
76  
77  
78  
79  
80  
81  
82  
83  
84  
85  
86  
87  
88  
89  
90

## Table of Contents

|                                                                |           |
|----------------------------------------------------------------|-----------|
| <b>SIGNATURE PAGE .....</b>                                    | <b>2</b>  |
| <b>ABBREVIATION .....</b>                                      | <b>4</b>  |
| <b>1. Introduction .....</b>                                   | <b>5</b>  |
| 1.1. Purpose of Statistical Analysis Plan .....                | 5         |
| <b>2. Study Objective .....</b>                                | <b>5</b>  |
| <b>3. Study Design .....</b>                                   | <b>5</b>  |
| 3.1. Overview .....                                            | 5         |
| 3.2. Sample Size .....                                         | 5         |
| 3.3. Randomization.....                                        | 6         |
| 3.4. Populations.....                                          | 6         |
| <b>4. Efficacys and Safety endpoints .....</b>                 | <b>7</b>  |
| 4.1. Primary Endpoint .....                                    | 7         |
| 4.2. Secondary Endpoints.....                                  | 7         |
| 4.3. Safety Endpoints .....                                    | 7         |
| <b>5. General considerations of statistical analysis .....</b> | <b>8</b>  |
| 5.1. General Statistical Methodology .....                     | 8         |
| 5.2. Handling of Missing Data .....                            | 8         |
| 5.3. Rounding .....                                            | 8         |
| 5.4. Statistical Software .....                                | 8         |
| <b>6. Statistical Methods.....</b>                             | <b>9</b>  |
| 6.1. Primary endpoint .....                                    | 9         |
| 6.2. Secondary endpoint.....                                   | 9         |
| 6.3. Multivariable Analysis .....                              | 10        |
| 6.4. Safety analysis .....                                     | 10        |
| 6.5. Additional summaries .....                                | 11        |
| 6.6. Interim Analysis .....                                    | 11        |
| <b>7. Reference .....</b>                                      | <b>11</b> |

91  
92  
93  
94

## ABBREVIATION

---

| <b>ABBREVIATION</b> | <b>DEFINITION</b>                         |
|---------------------|-------------------------------------------|
| AE                  | Adverse Event                             |
| CRF                 | Case Report Forms                         |
| CSR                 | Clinical Study Report                     |
| DBP                 | Diastolic Blood Pressure                  |
| DWI                 | Diffusion Weighted Image                  |
| GCP                 | Good Clinical Practice                    |
| ICH                 | International Conference on Harmonization |
| ITT                 | Intention to Treat                        |
| mRS                 | Modified Rankin Scale                     |
| NIHSS               | National Institute of Health Stroke Scale |
| PP                  | Per Protocol                              |
| SAP                 | Statistical Analysis Plan                 |
| SAE                 | Serious Adverse Event                     |
| SBP                 | Systolic Blood Pressure                   |

---

95  
96



97 **1. INTRODUCTION**

98 **1.1. Purpose of Statistical Analysis Plan**

99 This Statistical Analysis Plan (SAP) describes the planned analysis and reporting for Triple-AXEL  
100 study.

101 The planned analyses identified in this SAP may be included in clinical study reports (CSRs), or future  
102 manuscripts. Also post-hoc exploratory analyses not necessarily identified in this SAP may be  
103 performed to further examine study data. Any post-hoc, or unplanned, exploratory analyses  
104 performed will be clearly identified as such in the final CSR.

105 The following documents were reviewed in preparation of this SAP

- 106 • Protocol for Triple-AXEL study Version 3.2 Final issued 10<sup>th</sup> May 2015
- 107 • CRF for Triple-AXEL study
- 108 • ICH Guidance on Statistical Principle for Clinical Trials (E9).

109  
110  
111

112 **2. STUDY OBJECTIVE**

113 To assess the effects of warfarin or rivaroxaban after four-week treatment ( $30 \pm 5$  days) in acute  
114 cerebral infarction or transient ischemic attack with nonvalvular atrial fibrillation based on the  
115 independent investigator's brain image interpretation.

116

117 **3. STUDY DESIGN**

118 **3.1. Overview**

119 This is a phase 2, multicenter (12 institutions in South Korea), randomized, open label, blinded  
120 endpoint evaluation (PROBE) trial to compare the safety and efficacy of rivaroxaban vs. warfarin in  
121 patients with acute ischemic stroke or TIA due to presumed AF-related cardioembolism.

122  
123

124 **3.2. Sample Size**

125 The primary endpoint for the study is the composite of intracranial bleeding and recurrent ischemic  
126 lesion on MRI at four-weeks after randomization. The sample size is based on the data gained from  
127 earlier studies [1, 2, 3]

128 We calculated the sample size by assuming that the primary endpoint rate would be 25% in the  
129 warfarin group and that the absolute risk reduction with rivaroxaban would be 15%. With 80% power  
130 and a one-sided level of significance of 0.05, 89 patients are required per treatment group. Assuming  
131 a 10% dropout rate, 196 patients will be recruited.

132 The software PASS version 12 (NCSS, LLC. Kaysville, Utah, USA) was used for the sample size  
133 calculation.

134

135

### 136 **3.3. Randomization**

137 After screening, eligible patients will be randomly allocated to rivaroxaban or dose-adjusted warfarin  
138 (target INR 2–3) in a 1:1 ratio using an interactive web response system. Allocation will be by  
139 randomly permuted blocks and stratified by centre to enhance balance.

140

141

### 142 **3.4. Populations**

143

#### 144 **3.4.1. Target population**

145 The target population is patients with acute cerebral infarction or transient ischemic attack associated  
146 with non-valvular atrial fibrillation that meet all the inclusion and exclusion criteria and who are  
147 considered eligible to be entered into this clinical investigation.

148

#### 149 **3.4.2. Modified Intention-to-treat (modified ITT)**

150 The modified ITT is defined as all subjects randomized after giving the consent to participation in the  
151 study. However, the subjects who have never taken the investigational products (warfarin and  
152 rivaroxaban) or had no efficacy endpoints measured in the ITT set even after taking the  
153 investigational products will be excluded from the analysis.

154

#### 155 **3.4.3. Per Protocol (PP)**

156 The subjects in the modified ITT, who do not violate the inclusion/exclusion criteria and have  
157 rivaroxaban or warfarin compliance of  $\geq 80\%$  will be included in the analysis.

158

#### 159 **3.4.4. Safety Population**

160 The safety population is defined as any patient who received at least one administration of either  
161 treatment.

162

163 **4. EFFICACYS AND SAFETY ENDPOINTS**

164 **4.1. Primary Endpoint**

- 165 • The composite of intracranial bleeding and recurrent ischemic lesion on MRI at four-weeks after  
166 randomization

167

168 **4.2. Secondary Endpoints**

- 169 • Intracranial bleeding confirmed by brain imaging after 4 weeks treatment  
170 • Recurrent ischemic lesion confirmed by brain imaging after 4 weeks treatment  
171 • The total number of days of neurology division stay after randomization  
172 • Major bleeding defined by the International Society on Thrombosis and Haemostasis (ISTH)  
173 definition  
174 • Acute artery syndrome (myocardial infarction or unstable angina)  
175 • Major vascular events: stroke, myocardial infarction, or vascular death (including bleeding and  
176 ischemic vascular events)  
177 • Major vascular events and major bleeding (defined by the ISTH)  
178 • Clinical ischemic events: recurrent cerebral infarction, myocardial infarction, other ischemic  
179 events requiring vascular intervention and ischemic vascular death  
180 • The mRS (modified Rankin scale) 0-1 after 4 weeks treatment ( $30 \pm 5$  days)

181

182 **4.3. Safety Endpoints**

- 183 • Incidence of all of adverse events and serious adverse events

184

---

185 **5. GENERAL CONSIDERATIONS OF STATISTICAL ANALYSIS**

186

187 **5.1. General Statistical Methodology**

188 Descriptive summaries will be provided where appropriate for each of the primary and secondary  
189 endpoints. In general, summaries will be presented by patient population and by treatment groups  
190 and/or overall.

191 In general, continuous variable summaries will include the number of patients (N) (with non-missing  
192 values), mean, standard deviation (SD), median, interquartile range (1<sup>st</sup> and 3<sup>rd</sup> quartile), minimum  
193 and maximum.

194 Categorical variable summaries will include the frequency and percentage of patients who are in the  
195 particular category. In general the denominator for the percentage calculation will be based upon the  
196 total number of patients in the study population for the treatment groups and/or overall, unless  
197 otherwise specified.

198 The hypothesis testing for primary endpoint will be carried out at the one-sided 5% level of  
199 significance. In all secondary and safety endpoint, a two-sided 5% level of significance will be used.  
200 All secondary endpoints are exploratory and therefore no adjustment for multiple testing will be  
201 applied.

202

203 **5.2. Handling of Missing Data**

204 No adjustment for missing data will be applied. For all analyses missing data will be excluded from the  
205 analyses.

206

207 **5.3. Rounding**

208 All results will be presented to two decimal places or an appropriate number of significant figures for  
209 the magnitude of the results.

210

211 **5.4. Statistical Software**

212 Data manipulation, statistical summaries and statistical analyses will be performed using SAS®  
213 version 9.4 [4].

214

215

## 216 6. STATISTICAL METHODS

### 217 6.1. Primary endpoint

218 The primary endpoint for the study is the composite of intracranial bleeding and recurrent ischemic  
219 lesion on MRI at four-weeks after randomization. Analysis will be carried out using Chi-square test or  
220 Fisher's exact test. The estimated relative risk and absolute risk difference between two groups will be  
221 presented along with their 95% confidence intervals.

222 This analysis will be carried out on a number of different populations to ensure robustness in the  
223 results:

- 224 • modified ITT Population
- 225 • PP Population

226

### 227 6.2. Secondary endpoint

228 The following endpoints will be analyzed using Chi-square test or Fisher's exact test to investigate the  
229 treatment effects:

- 230 • Intracranial bleeding confirmed by brain imaging after 4 weeks treatment
- 231 • Recurrent ischemic lesion confirmed by brain imaging after 4 weeks treatment
- 232 • Major bleeding defined by the International Society on Thrombosis and Haemostasis (ISTH)  
233 definition
- 234 • Acute artery syndrome (myocardial infarction or unstable angina)
- 235 • Major vascular events: stroke, myocardial infarction, or vascular death (including bleeding and  
236 ischemic vascular events)
- 237 • Major vascular events and major bleeding (defined by the ISTH)
- 238 • Clinical ischemic events: recurrent cerebral infarction, myocardial infarction, other ischemic  
239 events requiring vascular intervention and ischemic vascular death
- 240 • The mRS (modified Rankin scale) 0-1 after 4 weeks treatment ( $30 \pm 5$  days)

241

242 For the following continuous endpoints the Wilcoxon rank sum test or Student's t-test will be used as  
243 appropriate. In order to test if the underlying assumptions of normality required for Student's t-test are  
244 valid the Shapiro-Wilk test will be performed. If the Shapiro-Wilk test indicates that there are  
245 significant violations of underlying normality ( $p$ -value  $< 0.05$ ) the Wilcoxon rank sum test will be used.

- 246 • The total number of days of neurology division stay after randomization

247

248 All secondary endpoint analyses will be carried out on a number of different populations to ensure  
249 robustness in the results:

- 250 • modified ITT Population
- 251 • PP Population

252

253 **6.3. Multivariable Analysis**

254 If there is a significant difference between the groups at baseline, multivariable analysis for primary  
255 and secondary endpoint will be conducted to adjust baseline imbalances. Multivariable analysis will  
256 be carried out using an analysis of covariance (ANCOVA) and Poisson regression according to the  
257 type of endpoints. Confounders to include in multivariable analysis are the stratification variable (site),  
258 clinical relevant variables and statistically significant baseline characteristics ( $p < 0.1$ ).

259

260 **6.4. Safety analysis**

261 The analysis of safety assessment in this study will include summaries of the following categories of  
262 safety data collected for each patient and will be presented for the Safety Population.

263

264 **6.4.1. Adverse Event**

265 The primary safety parameter is the occurrence of adverse event (AE) and serious adverse event  
266 (SAE). All data will be summarized within each treatment group. All SAEs and AEs will be listed using  
267 coding for System Organ Class and Preferred Term (using the MedDRA version 17.0).

268 An AE summary table will be presented including row with the number of patients with

- 269
- 270 • Adverse Event (AE)
  - 271 • Adverse Drug Reaction (ADR)
  - 272 • Serious Adverse Event (SAE).
  - 273 • AE leading to discontinuation of study drug
  - 274 • AE leading to death

275 AE will be summarized as follows:

- 276
- 277 • Number and percentage of patients with AEs classified by System Organ Class and Preferred  
278 Term
  - 279 • Number and percentage of patients by severity, System Organ Class and Preferred Term
  - 280 • Number and percentage of patients by relationship to randomized study medication, System  
281 Organ Class and Preferred Term
  - 282 • Number and percentage of patients with SAEs classified by System Organ Class and Preferred  
283 Term

284 A data listing of SAEs will be provided.

285

286 **6.4.2. Concomitant Medication**

287 Incidence of concomitant medications will be summarized by Anatomical Therapeutic Chemical (ATC)  
288 level 1 and ATC level 2 by treatment group.

289

290 **6.5. Additional summaries**

291 All demographic and baseline characteristics will be summarized by treatment group and across the  
292 whole trial. For continuous variables, descriptive statistics will be presented (mean, standard deviation,  
293 median, minimum, maximum, interquartile range and number of participants with data). For  
294 categorical variables, percentages and number of participants with data will be presented. The  
295 denominator for the percentages will be the number of patients with non-missing data.

296 Summaries will include the following:

- 297 • Patient disposition and reasons for withdrawal
- 298 • Patient demography (e.g. age, sex, etc.)
- 299 • Baseline vital sign (SBP, DBP, Pulse)
- 300 • Baseline laboratory test
- 301 • Baseline stroke characteristics (e.g. mRS, NIHSS, HAS BLED Score, CHA2DS2-VASC Score,  
302 Initial DWI volume, etc.)
- 303 • Treatment exposure: Compliance to study drug

304

305 **6.6. Interim Analysis**

306 We will perform a total of two formal analyzes (one interim analysis and one final analysis) in this  
307 study. When a majority of subjects (100) have completed the study, the interim safety analysis will be  
308 carried out in order to determine whether or not to continue the study. The safety analysis will be done  
309 by an independent statistician and no adjustment for multiple testing will be applied.

310

311 **7. REFERENCE**

- 312 1. Berge E, Abdelnoor M, Nakstad PH, Sandset PM. Low molecular-weight heparin versus aspirin in  
313 patients with acute ischaemic stroke and atrial fibrillation: a double-blind randomised study.  
314 HAEST Study Group. Heparin in Acute Embolic Stroke Trial. Lancet 2000;355:1205-10.
- 315 2. Patel MR, Mahaffey KW, Garg J et al. Rivaroxaban versus warfarin in nonvalvular atrial fibrillation.  
316 N Engl J Med 2011;365:883-91.
- 317 3. Kang DW, Latour LL, Chalela JA, Dambrosia J, Warach S. Early ischemic lesion recurrence  
318 within a week after acute ischemic stroke. Ann Neurol 2003;54:66-74.
- 319 4. SAS® Institute Inc. SAS Version 9.4 for Windows. SAS Institute Inc.: Cary, NC, U.S.A.
